# Supplementary material for: Molecular dynamics simulations of the secondary-binding site in disaccharide-modified glycopeptide antibiotics
Source: PubMed Central journal article supplement (PMC9056522; doi:10.1038/s41598-022-10735-6), 2022-04-30
Supplement: 41598_2022_10735_MOESM1_ESM.pdf [file 41598_2022_10735_MOESM1_ESM.pdf]

# Molecular dynamics simulations of the secondary-binding site in disaccharide-modified glycopeptide antibiotics

*Olatunde P. Olademehin,<sup>1</sup> Kevin L. Shuford<sup>1\*</sup>, and Sung J. Kim<sup>2\*</sup>*

<sup>1</sup> Department of Chemistry and Biochemistry, Baylor University, Waco, Texas 76706, U.S.A.

<sup>2</sup> Department of Chemistry, Howard University, Washington, D.C. 20059, U.S.A.

\*Corresponding authors

Kevin Shuford: [kevin\\_shuford@baylor.edu](mailto:kevin_shuford@baylor.edu) Tel: 254-710-2576

Sung Kim: [sung.kim@howard.edu](mailto:sung.kim@howard.edu) Tel: 314-570-3162

Keywords: glycopeptide, vancomycin, chloroeremomycin, oritavancin, *S. aureus*

## Supporting Information for publication

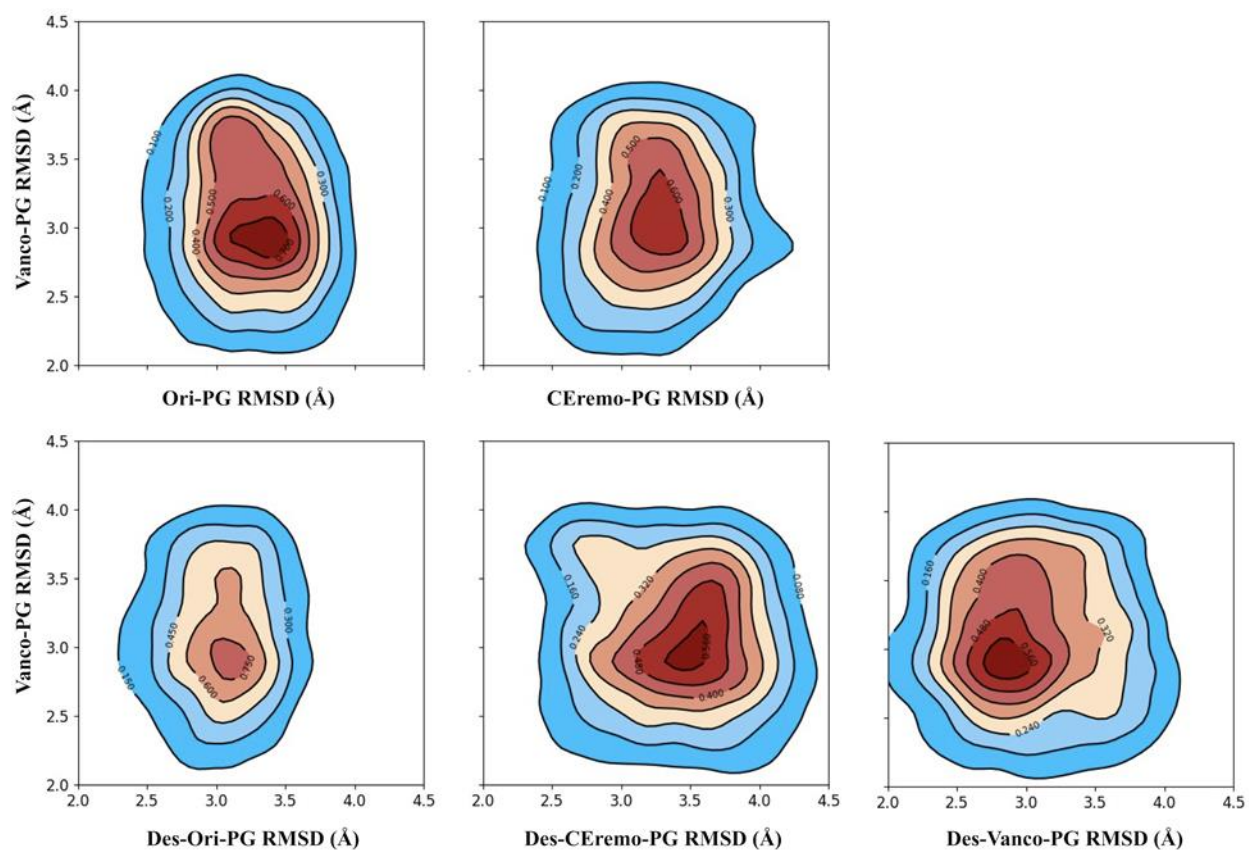

Figure S1. Comparative 2D rmsd ( $\text{\AA}$ ) contour plots of the Vanco-PG complex relative to the other complexes. Comparative 2D rmsd contour plots of Vanco-PG vs. Ori-PG (top left), Vanco-PG vs. CEremo-PG (top right), Vanco-PG vs. Des-Ori-PG (bottom left), Vanco-PG vs. Des-CEremo-PG (bottom middle), and Vanco-PG vs. Des-Vanco-PG complexes. The contour lines are the densities of trajectories located within an area. The region of the highest density of trajectories is denoted by the red color, while the blue colors represent regions of lower densities of trajectories.

Table S1. Center-of-mass (COM) pulling simulation data containing time taken to reach major dissociation between PG and (desleucyl)glycopeptide, the magnitude of the maximum force applied in pulling PG away from the (desleucyl)glycopeptide, and the time to reach the maximum force.

| <i>Complex</i> | <i>Major transition time (ps)</i> | <i>F<sub>max</sub> (kJ/mol/nm)</i> | <i>Time to reach F<sub>max</sub> (ps)</i> |
|----------------|-----------------------------------|------------------------------------|-------------------------------------------|
| Ori-PG         | 215                               | 645                                | 191                                       |
| Des-Ori-PG     | 194                               | 616                                | 141                                       |
| CEremo-PG      | 191                               | 719                                | 150                                       |
| Des-CEremo-PG  | 186                               | 579                                | 134                                       |
| Vanco-PG       | 198                               | 552                                | 127                                       |
| Des-Vanco-PG   | 156                               | 437                                | 68                                        |

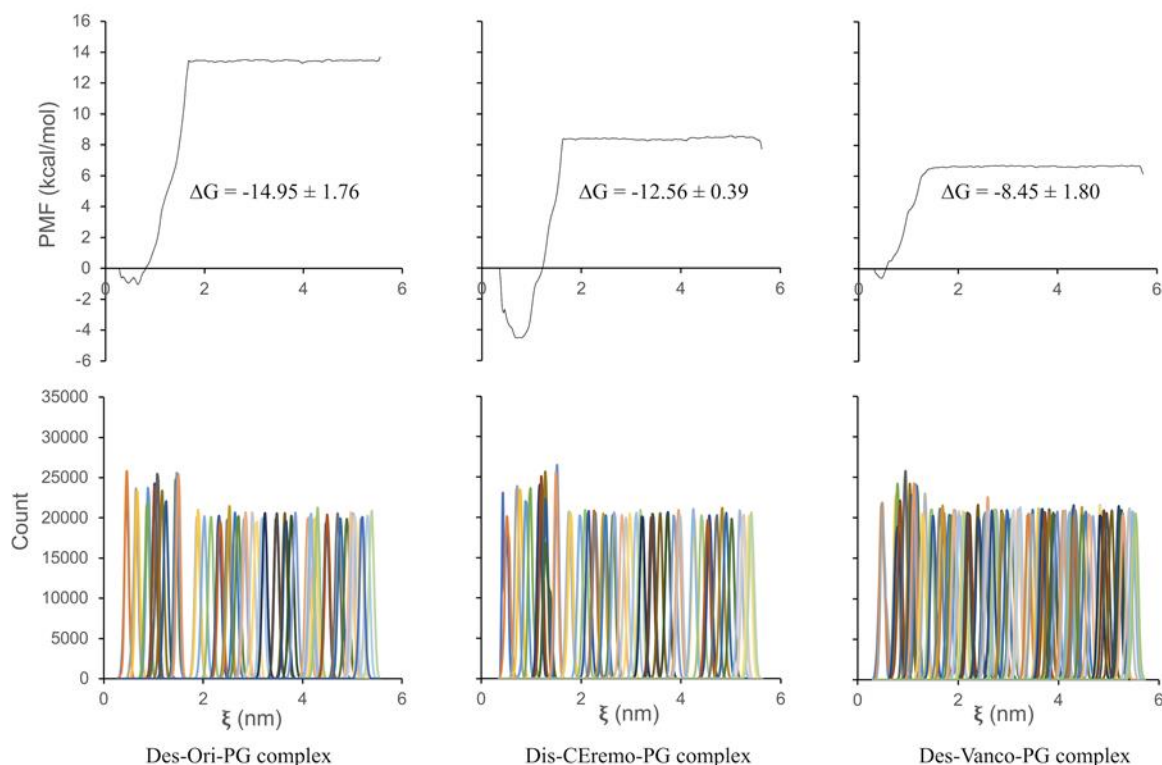

Figure S2. The potential of mean force (PMF) curve and corresponding umbrella histograms for complexes of desleucyl[<sup>19</sup>F]oritavancin-PG (left), desleucyl-chloroeremomycin-PG (middle), and desleucyl-vancomycin-PG (right). The  $\Delta G$  values of the complexes obtained from the PMF curve are shown as an inset.

Table S2. Cartesian coordinates for Ori-PG complex

|   | <i>x</i>  | <i>y</i>  | <i>z</i>  |
|---|-----------|-----------|-----------|
| C | -1.661539 | 7.465033  | 5.120902  |
| C | -0.662690 | 6.589786  | 4.381976  |
| O | 0.539481  | 6.796426  | 4.410927  |
| N | -1.219273 | 5.556919  | 3.674659  |
| C | -0.431340 | 4.736709  | 2.746723  |
| C | 0.514016  | 3.775857  | 3.503744  |
| C | 1.431474  | 2.986551  | 2.566460  |
| C | 2.261357  | 1.915459  | 3.281676  |
| C | 3.211037  | 1.217834  | 2.302248  |
| N | 3.927489  | 0.079239  | 2.873217  |
| C | -1.384038 | 3.957227  | 1.824245  |
| O | -1.255446 | 3.979825  | 0.596042  |
| N | -2.332114 | 3.258461  | 2.476998  |
| C | -3.269869 | 2.317096  | 1.874207  |
| C | -4.679945 | 2.916261  | 1.750028  |
| C | -3.299407 | 1.086752  | 2.807690  |
| O | -2.872057 | 1.183265  | 3.961343  |
| N | -3.853389 | -0.018380 | 2.292017  |
| C | -4.116635 | -1.207467 | 3.095341  |
| C | -2.887148 | -2.123671 | 3.190287  |
| C | -5.343578 | -1.975024 | 2.550200  |
| O | -5.748570 | -2.914616 | 3.276361  |
| O | -5.838640 | -1.612202 | 1.449705  |
| N | 5.636608  | 2.436592  | -1.791507 |
| C | 5.144247  | 1.289494  | -1.032094 |
| C | 6.261663  | 0.546984  | -0.293763 |
| O | 6.086827  | -0.574875 | 0.197393  |
| N | 7.424129  | 1.223228  | -0.230248 |
| C | 8.678776  | 0.652038  | 0.219668  |
| C | 9.439718  | 1.442871  | 1.291022  |
| O | 10.657834 | 1.428670  | 1.298170  |
| N | 8.685474  | 2.104006  | 2.214637  |
| C | 9.315975  | 2.832853  | 3.310191  |
| C | 9.496320  | 1.986153  | 4.585579  |
| O | 10.584431 | 1.801835  | 5.100364  |
| N | 8.334944  | 1.456490  | 5.062413  |
| C | 8.291674  | 0.445281  | 6.105640  |
| C | 7.178369  | -0.565434 | 5.803835  |
| O | 6.434450  | -0.981195 | 6.668177  |
| N | 7.073297  | -0.923405 | 4.472567  |

|   |           |           |           |
|---|-----------|-----------|-----------|
| C | 5.752879  | -1.143633 | 3.917135  |
| C | 5.144648  | 0.186234  | 3.425032  |
| O | 5.752905  | 1.257144  | 3.544348  |
| H | -4.370080 | -0.873657 | 4.103915  |
| H | -2.056880 | -1.584080 | 3.650494  |
| H | -3.129042 | -2.995629 | 3.799978  |
| H | -2.579654 | -2.458677 | 2.195473  |
| H | -4.199688 | -0.019761 | 1.335403  |
| H | -2.907118 | 2.031598  | 0.888438  |
| H | -4.653677 | 3.845472  | 1.179813  |
| H | -5.338296 | 2.210379  | 1.242693  |
| H | -5.093287 | 3.130757  | 2.739161  |
| H | -2.235924 | 3.110339  | 3.478708  |
| H | 0.163503  | 5.390485  | 2.104276  |
| H | -2.220732 | 5.559083  | 3.551543  |
| H | -2.529087 | 6.900338  | 5.470711  |
| H | -2.013854 | 8.254453  | 4.450267  |
| H | -1.156408 | 7.923670  | 5.970022  |
| H | 1.110101  | 4.381580  | 4.188646  |
| H | -0.084541 | 3.086545  | 4.109202  |
| H | 0.833438  | 2.497202  | 1.789915  |
| H | 2.098301  | 3.685714  | 2.046516  |
| H | 2.846075  | 2.360135  | 4.093489  |
| H | 1.595465  | 1.172719  | 3.733740  |
| H | 2.649311  | 0.842070  | 1.443504  |
| H | 3.950957  | 1.937560  | 1.944444  |
| H | 3.608117  | -0.850358 | 2.618483  |
| H | 5.783032  | -1.849668 | 3.085253  |
| H | 5.123825  | -1.569664 | 4.700004  |
| H | 7.676752  | -0.388283 | 3.863208  |
| H | 9.272925  | -0.035616 | 6.155675  |
| H | 8.073008  | 0.862732  | 7.091196  |
| H | 7.455380  | 1.659853  | 4.593595  |
| H | 10.311213 | 3.133186  | 2.990633  |
| H | 8.719696  | 3.721585  | 3.534997  |
| H | 7.676678  | 2.041754  | 2.172035  |
| H | 8.468348  | -0.347408 | 0.608052  |
| H | 9.376225  | 0.543159  | -0.613811 |
| H | 7.399638  | 2.107075  | -0.736405 |
| H | 4.437698  | 1.636270  | -0.275169 |
| H | 4.610060  | 0.538724  | -1.626346 |
| H | 5.863694  | 2.169571  | -2.743234 |
| H | 4.938985  | 3.178393  | -1.848068 |
| N | -9.281012 | -2.782320 | 5.983592  |
| C | -8.783729 | -2.442612 | 4.648427  |
| C | -9.240243 | -3.473707 | 3.598984  |

|    |            |           |           |
|----|------------|-----------|-----------|
| O  | -10.397888 | -3.876434 | 3.595515  |
| C  | -9.334935  | -1.071140 | 4.208388  |
| C  | -8.887703  | 0.125330  | 5.066589  |
| C  | -9.702955  | 1.369124  | 4.681383  |
| C  | -7.385344  | 0.405330  | 4.924692  |
| H  | -7.089283  | 1.271246  | 5.525774  |
| H  | -7.130157  | 0.614991  | 3.880900  |
| H  | -6.779569  | -0.442855 | 5.252297  |
| H  | -9.406129  | 2.237301  | 5.279671  |
| H  | -10.774335 | 1.204334  | 4.837362  |
| H  | -9.553798  | 1.614198  | 3.625205  |
| C  | -8.659163  | -3.972723 | 6.557080  |
| N  | -8.295271  | -3.874187 | 2.687992  |
| C  | -8.690598  | -4.691075 | 1.556652  |
| C  | -8.679028  | -4.018234 | 0.174400  |
| O  | -9.220683  | -4.611422 | -0.753851 |
| C  | -7.974967  | -6.087162 | 1.531453  |
| O  | -7.965284  | -6.634007 | 2.840104  |
| C  | -6.587353  | -6.071834 | 0.906653  |
| C  | -5.466075  | -5.630081 | 1.614286  |
| C  | -6.429750  | -6.486718 | -0.416811 |
| C  | -4.236341  | -5.516688 | 0.980019  |
| C  | -5.191622  | -6.389827 | -1.042510 |
| Cl | -5.023701  | -6.901644 | -2.715873 |
| C  | -4.096911  | -5.862405 | -0.360635 |
| O  | -2.893684  | -5.624932 | -1.009510 |
| N  | -8.118434  | -2.782749 | 0.049145  |
| C  | -8.347874  | -2.022230 | -1.167985 |
| C  | -7.125487  | -1.497924 | -1.939863 |
| O  | -7.322196  | -1.001008 | -3.049464 |
| C  | -9.376758  | -0.870724 | -0.975677 |
| C  | -8.857486  | 0.315465  | -0.168613 |
| O  | -9.094414  | 0.459826  | 1.019459  |
| N  | -8.120951  | 1.215005  | -0.886882 |
| H  | -7.630636  | 1.931582  | -0.374119 |
| H  | -7.820432  | 1.004143  | -1.827254 |
| N  | -5.892092  | -1.605034 | -1.390776 |
| C  | -4.734462  | -1.171843 | -2.157471 |
| C  | -4.326416  | 0.275946  | -1.806018 |
| O  | -4.131554  | 0.629414  | -0.648968 |
| C  | -3.542437  | -2.121805 | -1.979206 |
| C  | -3.762899  | -3.426702 | -1.556678 |
| C  | -2.241382  | -1.711577 | -2.274244 |
| C  | -2.704733  | -4.328374 | -1.436621 |
| C  | -1.182676  | -2.603251 | -2.125108 |
| C  | -1.397079  | -3.930330 | -1.735856 |

|    |           |           |           |
|----|-----------|-----------|-----------|
| O  | -0.340100 | -4.807035 | -1.575334 |
| N  | -4.145375 | 1.101445  | -2.866106 |
| C  | -3.354741 | 2.322928  | -2.760326 |
| C  | -2.493047 | 2.391673  | -4.047339 |
| O  | -2.905919 | 1.863002  | -5.073798 |
| C  | -4.098491 | 3.654507  | -2.657648 |
| C  | -3.729593 | 4.554002  | -1.658641 |
| C  | -4.131690 | 5.895721  | -1.672426 |
| C  | -5.443899 | 5.399335  | -3.661924 |
| C  | -4.980813 | 4.092323  | -3.654363 |
| C  | -4.995404 | 6.312931  | -2.700217 |
| O  | -5.421139 | 7.600486  | -2.799629 |
| N  | -1.330357 | 3.085097  | -4.007265 |
| C  | -0.729052 | 3.778207  | -2.883037 |
| C  | -0.981829 | 5.298574  | -3.046731 |
| O  | -1.170041 | 5.772721  | -4.157779 |
| C  | 0.766251  | 3.387589  | -2.718980 |
| O  | 1.483071  | 3.928686  | -3.819980 |
| C  | 0.850110  | 1.872606  | -2.603588 |
| C  | 0.978196  | 1.052131  | -3.725944 |
| C  | 0.595465  | 1.283588  | -1.364148 |
| C  | 0.767141  | -0.319111 | -3.623455 |
| C  | 0.394730  | -0.088010 | -1.258387 |
| Cl | 0.040724  | -0.782343 | 0.306791  |
| C  | 0.429638  | -0.894134 | -2.402044 |
| O  | 0.140035  | -2.243044 | -2.354516 |
| N  | -1.068776 | 5.979255  | -1.889803 |
| C  | -1.450229 | 7.387067  | -1.847822 |
| C  | -0.200957 | 8.368541  | -1.881629 |
| C  | -2.443403 | 7.597387  | -0.697252 |
| C  | -2.130399 | 8.486911  | 0.330339  |
| C  | -3.665081 | 6.875467  | -0.632518 |
| C  | -2.988906 | 8.662726  | 1.412986  |
| O  | -2.685100 | 9.536110  | 2.428418  |
| C  | -4.506807 | 7.073315  | 0.481937  |
| O  | -5.688174 | 6.397719  | 0.609388  |
| C  | -4.178868 | 7.953824  | 1.509253  |
| O  | -0.470492 | 9.571549  | -1.777637 |
| O  | 0.911577  | 7.804459  | -2.051317 |
| C  | 0.163345  | -5.348341 | -2.766913 |
| C  | 1.363219  | -6.245553 | -2.457397 |
| O  | 2.489293  | -5.483288 | -2.020934 |
| C  | 1.797452  | -6.981861 | -3.737175 |
| O  | 2.844903  | -7.903816 | -3.465151 |
| C  | 0.648197  | -7.710267 | -4.423407 |
| O  | 1.033841  | -8.268178 | -5.676093 |

|   |           |           |           |
|---|-----------|-----------|-----------|
| C | -0.530160 | -6.736955 | -4.598289 |
| O | -0.862023 | -6.136614 | -3.348177 |
| C | -1.799995 | -7.422810 | -5.092188 |
| O | -2.292127 | -8.369510 | -4.162469 |
| H | 0.449441  | -4.543101 | -3.460315 |
| H | -2.549985 | -6.652784 | -5.314309 |
| H | -1.567722 | -7.964952 | -6.010329 |
| C | 3.141487  | -5.924427 | -0.829377 |
| C | 4.588076  | -5.424352 | -0.857744 |
| C | 4.756929  | -3.922676 | -0.538449 |
| N | 6.202470  | -3.639349 | -0.372930 |
| C | 4.300913  | -3.055046 | -1.725003 |
| C | 3.922838  | -3.633153 | 0.742077  |
| C | 2.468419  | -4.121044 | 0.612582  |
| O | 2.470575  | -5.538451 | 0.335771  |
| C | 1.665259  | -3.947204 | 1.889058  |
| H | 3.121489  | -7.018425 | -0.805859 |
| H | 5.042275  | -5.636549 | -1.829149 |
| H | 5.128516  | -6.012146 | -0.110790 |
| H | 4.422162  | -1.994850 | -1.494741 |
| H | 3.262826  | -3.238911 | -1.989562 |
| H | 4.924697  | -3.287569 | -2.591661 |
| H | 0.658119  | -4.340506 | 1.742611  |
| H | 1.593227  | -2.891759 | 2.151691  |
| H | 2.133974  | -4.490848 | 2.714696  |
| O | 3.910599  | -2.250323 | 1.103185  |
| H | 6.363333  | -2.641967 | -0.476453 |
| C | 9.083242  | -4.265080 | -0.438554 |
| C | 8.390622  | -3.874531 | 0.712304  |
| C | 9.118349  | -3.291903 | 1.752598  |
| C | 10.496234 | -3.110817 | 1.653110  |
| C | 11.194816 | -3.513189 | 0.507751  |
| C | 10.457902 | -4.092684 | -0.537081 |
| C | 13.502332 | -3.550689 | 1.503434  |
| C | 12.664220 | -3.333384 | 0.399607  |
| C | 13.259630 | -2.944236 | -0.809602 |
| C | 14.636895 | -2.781625 | -0.920727 |
| C | 15.426698 | -3.009097 | 0.194777  |
| C | 14.881114 | -3.390027 | 1.410097  |
| F | 16.769621 | -2.854264 | 0.094255  |
| C | 6.895166  | -4.098010 | 0.830227  |
| C | 2.905190  | 3.903336  | -3.711968 |
| C | 3.504381  | 4.717672  | -4.853176 |
| C | 3.412763  | 6.268225  | -4.721170 |
| N | 4.403385  | 6.910947  | -5.609959 |
| C | 2.039530  | 6.793708  | -5.147610 |



|   |            |           |           |
|---|------------|-----------|-----------|
| C | 3.770819   | 6.682615  | -3.255756 |
| C | 3.122752   | 5.772419  | -2.193350 |
| O | 3.370587   | 4.356323  | -2.463719 |
| C | 3.660989   | 6.039936  | -0.799653 |
| H | 3.242125   | 2.859578  | -3.760684 |
| H | 3.058748   | 4.400440  | -5.801914 |
| H | 4.565662   | 4.442851  | -4.888985 |
| H | 2.039630   | 7.880586  | -5.079291 |
| H | 1.225146   | 6.403966  | -4.543502 |
| H | 1.845288   | 6.508637  | -6.188799 |
| H | 3.158583   | 5.405027  | -0.065046 |
| H | 3.478295   | 7.081741  | -0.540699 |
| H | 4.738373   | 5.847547  | -0.753248 |
| O | 3.480705   | 8.027627  | -2.965464 |
| H | -9.095590  | -0.123251 | 6.113390  |
| H | -9.063799  | -0.882935 | 3.164514  |
| H | -10.429501 | -1.142650 | 4.228104  |
| H | -7.691957  | -2.419961 | 4.679583  |
| H | -9.083160  | -4.161397 | 7.547725  |
| H | -8.786268  | -4.890513 | 5.957242  |
| H | -7.586617  | -3.799152 | 6.681961  |
| H | -10.280032 | -2.949329 | 5.888155  |
| H | -7.329924  | -3.509318 | 2.794977  |
| H | -9.746046  | -4.912958 | 1.731575  |
| H | -7.886845  | -5.887571 | 3.449308  |
| H | -8.605681  | -6.735771 | 0.921160  |
| H | -5.556806  | -5.307617 | 2.642230  |
| H | -3.376710  | -5.112906 | 1.500977  |
| H | -7.281448  | -6.845390 | -0.980707 |
| H | -4.765226  | -3.744382 | -1.316620 |
| H | -2.039058  | -0.700219 | -2.596162 |
| H | -5.052665  | -1.194496 | -3.202923 |
| H | -5.786170  | -1.752231 | -0.380639 |
| H | -8.806775  | -2.732212 | -1.859241 |
| H | -7.589814  | -2.364733 | 0.816975  |
| H | -9.679853  | -0.537607 | -1.970255 |
| H | -10.244049 | -1.271523 | -0.452473 |
| H | -2.537356  | -7.881552 | -3.366026 |
| H | -0.240793  | -5.959113 | -5.327753 |
| H | 0.316556   | -8.551387 | -3.811500 |
| H | 1.558527   | -7.610505 | -6.144986 |
| H | 3.605379   | -7.383191 | -3.187193 |
| H | 2.163301   | -6.205792 | -4.433673 |
| H | 1.054601   | -6.958875 | -1.687440 |
| H | 1.969691   | -3.596640 | -0.206613 |
| H | 4.368915   | -4.209523 | 1.565555  |

|   |           |           |           |
|---|-----------|-----------|-----------|
| H | 4.651388  | -1.770918 | 0.693512  |
| H | 6.546007  | -3.620286 | 1.758510  |
| H | 6.712001  | -5.171096 | 0.955575  |
| H | 8.602528  | -2.962406 | 2.649590  |
| H | 8.526041  | -4.699498 | -1.260115 |
| H | 11.027568 | -2.617820 | 2.459264  |
| H | 10.973859 | -4.433615 | -1.428213 |
| H | 15.531001 | -3.561398 | 2.259313  |
| H | 13.071421 | -3.868700 | 2.445279  |
| H | 12.633906 | -2.739062 | -1.669987 |
| H | 15.098453 | -2.468826 | -1.849217 |
| H | -4.247627 | 0.752230  | -3.812343 |
| H | 0.487011  | 1.902198  | -0.481012 |
| H | 1.179731  | 1.497839  | -4.691531 |
| H | 0.802116  | -0.958306 | -4.497523 |
| H | 1.121889  | 3.838365  | -1.789181 |
| H | 2.046393  | 5.952079  | -2.200624 |
| H | 4.863062  | 6.571024  | -3.161978 |
| H | 2.535658  | 8.104924  | -2.687425 |
| H | 5.333889  | 6.545666  | -5.421933 |
| H | 4.186850  | 6.685253  | -6.577699 |
| H | -0.970646 | 3.350671  | -4.915607 |
| H | -1.206205 | 3.448274  | -1.964149 |
| H | -0.905477 | 5.497655  | -1.013609 |
| H | -1.964789 | 7.578819  | -2.794608 |
| H | -4.851095 | 8.090605  | 2.346188  |
| H | -1.236566 | 9.091597  | 0.234836  |
| H | -1.849348 | 9.964990  | 2.211770  |
| H | -5.779728 | 5.806319  | -0.150657 |
| H | -4.966779 | 8.117362  | -2.118192 |
| H | -6.113644 | 5.752718  | -4.436606 |
| H | -5.275450 | 3.417498  | -4.450312 |
| H | -3.062112 | 4.233286  | -0.867949 |
| H | -2.741094 | 2.215837  | -1.866728 |

Table S3. Cartesian coordinates for Des-Ori-PG complex

|   | <i>x</i>  | <i>y</i> | <i>z</i> |
|---|-----------|----------|----------|
| C | -2.144910 | 7.475828 | 5.278923 |
| C | -1.167289 | 6.630927 | 4.478818 |
| O | 0.014171  | 6.916654 | 4.372678 |
| N | -1.718987 | 5.529230 | 3.879829 |
| C | -0.973698 | 4.715787 | 2.911583 |

|   |           |           |           |
|---|-----------|-----------|-----------|
| C | 0.108547  | 3.858472  | 3.607120  |
| C | 0.979260  | 3.083787  | 2.614671  |
| C | 1.950397  | 2.106953  | 3.285615  |
| C | 2.842389  | 1.423582  | 2.243882  |
| N | 3.691061  | 0.364722  | 2.786356  |
| C | -1.958065 | 3.829813  | 2.129110  |
| O | -1.956594 | 3.798000  | 0.894397  |
| N | -2.783751 | 3.105009  | 2.907641  |
| C | -3.709525 | 2.075005  | 2.448358  |
| C | -5.163424 | 2.573911  | 2.446136  |
| C | -3.557961 | 0.894621  | 3.433107  |
| O | -3.023636 | 1.077548  | 4.530328  |
| N | -4.082580 | -0.269139 | 3.027435  |
| C | -4.179032 | -1.430278 | 3.905505  |
| C | -2.885095 | -2.258393 | 3.911550  |
| C | -5.398121 | -2.302967 | 3.526102  |
| O | -5.660546 | -3.228642 | 4.331348  |
| O | -6.026436 | -2.029832 | 2.468542  |
| N | 4.748901  | 2.587154  | -2.130922 |
| C | 4.417685  | 1.450691  | -1.274353 |
| C | 5.653483  | 0.821224  | -0.625010 |
| O | 5.608398  | -0.283098 | -0.069303 |
| N | 6.766142  | 1.574122  | -0.713348 |
| C | 8.096871  | 1.109601  | -0.372464 |
| C | 8.905247  | 2.001995  | 0.577488  |
| O | 10.115794 | 2.067565  | 0.457747  |
| N | 8.204098  | 2.658884  | 1.544925  |
| C | 8.889826  | 3.482243  | 2.535302  |
| C | 9.257465  | 2.715317  | 3.820878  |
| O | 10.402399 | 2.628803  | 4.226592  |
| N | 8.190416  | 2.136158  | 4.439497  |
| C | 8.324128  | 1.178866  | 5.525063  |
| C | 7.259526  | 0.083681  | 5.386244  |
| O | 6.638068  | -0.334985 | 6.341163  |
| N | 7.045328  | -0.347880 | 4.090354  |
| C | 5.694083  | -0.681734 | 3.686391  |
| C | 4.947402  | 0.578819  | 3.202520  |
| O | 5.488083  | 1.691773  | 3.210227  |
| H | -4.351650 | -1.062628 | 4.919370  |
| H | -2.052296 | -1.643066 | 4.258123  |
| H | -3.002216 | -3.111987 | 4.581032  |
| H | -2.657361 | -2.623011 | 2.905753  |
| H | -4.523155 | -0.341919 | 2.113306  |
| H | -3.429507 | 1.763786  | 1.443584  |
| H | -5.260293 | 3.472530  | 1.835916  |
| H | -5.818745 | 1.801658  | 2.042077  |

|    |           |           |           |
|----|-----------|-----------|-----------|
| H  | -5.488331 | 2.811247  | 3.462675  |
| H  | -2.576328 | 3.014808  | 3.899335  |
| H  | -0.494354 | 5.373269  | 2.182237  |
| H  | -2.725446 | 5.459858  | 3.862210  |
| H  | -2.930799 | 6.874413  | 5.742136  |
| H  | -2.617864 | 8.205345  | 4.614709  |
| H  | -1.589655 | 8.009154  | 6.049485  |
| H  | 0.727102  | 4.535920  | 4.198527  |
| H  | -0.375744 | 3.163445  | 4.301671  |
| H  | 0.341320  | 2.517507  | 1.927290  |
| H  | 1.539282  | 3.797445  | 1.997503  |
| H  | 2.581827  | 2.629646  | 4.011397  |
| H  | 1.387472  | 1.346463  | 3.837164  |
| H  | 2.224187  | 0.968666  | 1.466029  |
| H  | 3.489949  | 2.170773  | 1.779251  |
| H  | 3.413427  | -0.595498 | 2.607650  |
| H  | 5.689112  | -1.425856 | 2.887843  |
| H  | 5.179072  | -1.107311 | 4.548796  |
| H  | 7.544888  | 0.193606  | 3.398209  |
| H  | 9.336666  | 0.766099  | 5.493282  |
| H  | 8.177828  | 1.630960  | 6.508733  |
| H  | 7.255766  | 2.257585  | 4.056791  |
| H  | 9.824022  | 3.830066  | 2.100432  |
| H  | 8.258620  | 4.340557  | 2.781891  |
| H  | 7.203037  | 2.528950  | 1.610906  |
| H  | 7.997465  | 0.119706  | 0.079467  |
| H  | 8.712104  | 1.003975  | -1.268739 |
| H  | 6.628576  | 2.427496  | -1.252613 |
| H  | 3.768989  | 1.788896  | -0.463667 |
| H  | 3.879912  | 0.637355  | -1.775782 |
| H  | 4.896446  | 2.287249  | -3.088492 |
| H  | 3.998885  | 3.278074  | -2.146801 |
| N  | -8.180258 | -4.380872 | 4.055561  |
| C  | -8.630065 | -5.278476 | 3.008900  |
| C  | -8.805908 | -4.677767 | 1.604729  |
| O  | -9.396006 | -5.351602 | 0.765299  |
| C  | -7.824625 | -6.624438 | 2.970493  |
| O  | -7.643984 | -7.101958 | 4.293764  |
| C  | -6.512031 | -6.550665 | 2.203853  |
| C  | -5.358493 | -6.001249 | 2.770111  |
| C  | -6.460777 | -7.021433 | 0.890737  |
| C  | -4.210406 | -5.840517 | 2.006265  |
| C  | -5.302335 | -6.876162 | 0.135252  |
| Cl | -5.269535 | -7.460723 | -1.522309 |
| C  | -4.183777 | -6.244417 | 0.674924  |
| O  | -3.072170 | -5.962503 | -0.106129 |

|    |           |           |           |
|----|-----------|-----------|-----------|
| N  | -8.348861 | -3.416396 | 1.367182  |
| C  | -8.753274 | -2.735579 | 0.148422  |
| C  | -7.655226 | -2.172849 | -0.769481 |
| O  | -7.997782 | -1.747108 | -1.873218 |
| C  | -9.835493 | -1.645234 | 0.396414  |
| C  | -9.321448 | -0.388079 | 1.091654  |
| O  | -9.446198 | -0.198987 | 2.290475  |
| N  | -8.726403 | 0.519684  | 0.261320  |
| H  | -8.238035 | 1.291925  | 0.687884  |
| H  | -8.508767 | 0.281109  | -0.695127 |
| N  | -6.368047 | -2.171203 | -0.348293 |
| C  | -5.327352 | -1.703229 | -1.250256 |
| C  | -4.988220 | -0.215880 | -1.007568 |
| O  | -4.702270 | 0.208147  | 0.106033  |
| C  | -4.059776 | -2.563172 | -1.156023 |
| C  | -4.144274 | -3.856380 | -0.655661 |
| C  | -2.827309 | -2.084657 | -1.603376 |
| C  | -3.018824 | -4.679892 | -0.607380 |
| C  | -1.699074 | -2.896684 | -1.526702 |
| C  | -1.779379 | -4.213303 | -1.059057 |
| O  | -0.652752 | -5.009944 | -0.971549 |
| N  | -4.973909 | 0.564453  | -2.116120 |
| C  | -4.264165 | 1.838653  | -2.147580 |
| C  | -3.544381 | 1.897586  | -3.519470 |
| O  | -4.021158 | 1.291422  | -4.472792 |
| C  | -5.085132 | 3.122453  | -2.026411 |
| C  | -4.680761 | 4.093902  | -1.112101 |
| C  | -5.175202 | 5.404117  | -1.142840 |
| C  | -6.644385 | 4.722367  | -2.960286 |
| C  | -6.092483 | 3.450394  | -2.943642 |
| C  | -6.165795 | 5.711149  | -2.091986 |
| O  | -6.688582 | 6.961475  | -2.202937 |
| N  | -2.435081 | 2.666422  | -3.631878 |
| C  | -1.772915 | 3.453729  | -2.608383 |
| C  | -2.146895 | 4.944053  | -2.811558 |
| O  | -2.479570 | 5.347583  | -3.916618 |
| C  | -0.245007 | 3.170243  | -2.584649 |
| O  | 0.316775  | 3.699966  | -3.777382 |
| C  | -0.043933 | 1.671813  | -2.412024 |
| C  | 0.026844  | 0.805192  | -3.504373 |
| C  | -0.129667 | 1.131511  | -1.127999 |
| C  | -0.076127 | -0.569862 | -3.320041 |
| C  | -0.222040 | -0.243057 | -0.941480 |
| Cl | -0.365964 | -0.878154 | 0.681215  |
| C  | -0.246897 | -1.102535 | -2.045874 |
| O  | -0.434955 | -2.463256 | -1.908911 |

|   |           |           |           |
|---|-----------|-----------|-----------|
| N | -2.163545 | 5.675806  | -1.683006 |
| C | -2.636475 | 7.056080  | -1.663412 |
| C | -1.468929 | 8.113846  | -1.870975 |
| C | -3.520128 | 7.259723  | -0.425621 |
| C | -3.167626 | 8.219053  | 0.523376  |
| C | -4.675340 | 6.463996  | -0.201655 |
| C | -3.922110 | 8.393614  | 1.681113  |
| O | -3.578839 | 9.335640  | 2.619703  |
| C | -5.411488 | 6.663232  | 0.984957  |
| O | -6.523582 | 5.919500  | 1.264975  |
| C | -5.043562 | 7.614538  | 1.932515  |
| O | -1.810156 | 9.300476  | -1.792458 |
| O | -0.342564 | 7.615514  | -2.131130 |
| C | -0.236061 | -5.577435 | -2.184253 |
| C | 1.048918  | -6.377597 | -1.962764 |
| O | 2.157257  | -5.522302 | -1.680547 |
| C | 1.401645  | -7.148433 | -3.247262 |
| O | 2.533295  | -7.985097 | -3.045982 |
| C | 0.242599  | -7.984249 | -3.776698 |
| O | 0.537354  | -8.579082 | -5.037056 |
| C | -1.012706 | -7.099972 | -3.870029 |
| O | -1.257324 | -6.459482 | -2.619726 |
| C | -2.274888 | -7.891418 | -4.197633 |
| O | -2.602646 | -8.819460 | -3.180714 |
| H | -0.078890 | -4.791725 | -2.938590 |
| H | -3.095639 | -7.184235 | -4.373765 |
| H | -2.099511 | -8.463447 | -5.110254 |
| C | 2.956228  | -5.858599 | -0.545506 |
| C | 4.353868  | -5.267447 | -0.747101 |
| C | 4.448594  | -3.743621 | -0.513708 |
| N | 5.880044  | -3.358642 | -0.513010 |
| C | 3.814929  | -2.969260 | -1.683100 |
| C | 3.730441  | -3.444048 | 0.833062  |
| C | 2.308167  | -4.031628 | 0.878098  |
| O | 2.381550  | -5.458164 | 0.665307  |
| C | 1.628404  | -3.845532 | 2.222705  |
| H | 3.015422  | -6.948945 | -0.471843 |
| H | 4.720958  | -5.498925 | -1.750403 |
| H | 5.007124  | -5.779877 | -0.035631 |
| H | 3.884318  | -1.893047 | -1.513730 |
| H | 2.770812  | -3.233631 | -1.829217 |
| H | 4.362357  | -3.204599 | -2.599182 |
| H | 0.641651  | -4.310574 | 2.199926  |
| H | 1.509602  | -2.784992 | 2.444672  |
| H | 2.215368  | -4.314619 | 3.017910  |
| O | 3.658023  | -2.048322 | 1.132185  |

|   |           |           |           |
|---|-----------|-----------|-----------|
| H | 5.959297  | -2.359489 | -0.676644 |
| C | 8.776036  | -3.797903 | -0.852092 |
| C | 8.178046  | -3.395055 | 0.346593  |
| C | 8.964899  | -2.713900 | 1.278335  |
| C | 10.309498 | -2.448750 | 1.027325  |
| C | 10.914791 | -2.862712 | -0.166000 |
| C | 10.118141 | -3.541574 | -1.101428 |
| C | 13.308313 | -2.698917 | 0.583430  |
| C | 12.349423 | -2.593318 | -0.435131 |
| C | 12.790394 | -2.228457 | -1.715973 |
| C | 14.134492 | -1.982353 | -1.977667 |
| C | 15.047338 | -2.100635 | -0.942001 |
| C | 14.655857 | -2.453748 | 0.339336  |
| F | 16.358976 | -1.863978 | -1.189224 |
| C | 6.721612  | -3.709170 | 0.630090  |
| C | 1.740779  | 3.772864  | -3.817767 |
| C | 2.162606  | 4.565173  | -5.050178 |
| C | 1.976429  | 6.111177  | -4.977760 |
| N | 2.824326  | 6.770849  | -5.992784 |
| C | 0.533602  | 6.523621  | -5.280897 |
| C | 2.451332  | 6.622293  | -3.577550 |
| C | 1.979726  | 5.727246  | -2.414093 |
| O | 2.297476  | 4.318351  | -2.646251 |
| C | 2.636454  | 6.100071  | -1.097519 |
| H | 2.143339  | 2.752151  | -3.855435 |
| H | 1.646385  | 4.171556  | -5.932170 |
| H | 3.231418  | 4.358606  | -5.184703 |
| H | 0.464473  | 7.610264  | -5.260921 |
| H | -0.185998 | 6.113006  | -4.578302 |
| H | 0.255224  | 6.173712  | -6.282466 |
| H | 2.256866  | 5.472118  | -0.287114 |
| H | 2.408417  | 7.139621  | -0.867027 |
| H | 3.723808  | 5.980900  | -1.155679 |
| O | 2.098627  | 7.958612  | -3.318042 |
| H | -7.529977 | -3.723707 | 3.674420  |
| H | -8.965323 | -3.891232 | 4.434935  |
| H | -9.644177 | -5.559426 | 3.302914  |
| H | -7.556663 | -6.321868 | 4.857930  |
| H | -8.466974 | -7.343072 | 2.458726  |
| H | -5.366879 | -5.633317 | 3.786693  |
| H | -3.332791 | -5.355518 | 2.416108  |
| H | -7.338035 | -7.463152 | 0.435416  |
| H | -5.092353 | -4.226012 | -0.298270 |
| H | -2.730039 | -1.080025 | -1.988948 |
| H | -5.747564 | -1.799914 | -2.254651 |
| H | -6.150177 | -2.259418 | 0.650714  |

|   |            |           |           |
|---|------------|-----------|-----------|
| H | -9.229030  | -3.508316 | -0.459059 |
| H | -7.775693  | -2.926172 | 2.056311  |
| H | -10.260482 | -1.383788 | -0.574693 |
| H | -10.615026 | -2.074445 | 1.024652  |
| H | -2.799425  | -8.308487 | -2.385260 |
| H | -0.854026  | -6.343194 | -4.659330 |
| H | 0.034479   | -8.812844 | -3.096982 |
| H | 0.964404   | -7.913426 | -5.586800 |
| H | 3.279680   | -7.402523 | -2.872341 |
| H | 1.639691   | -6.386756 | -4.011735 |
| H | 0.870720   | -7.069263 | -1.134060 |
| H | 1.693420   | -3.583341 | 0.093283  |
| H | 4.297013   | -3.947333 | 1.629932  |
| H | 4.318025   | -1.543220 | 0.626518  |
| H | 6.435784   | -3.208435 | 1.567858  |
| H | 6.627746   | -4.784107 | 0.821078  |
| H | 8.520892   | -2.373339 | 2.208985  |
| H | 8.170206   | -4.309078 | -1.590891 |
| H | 10.883992  | -1.881669 | 1.750942  |
| H | 10.563678  | -3.893222 | -2.025766 |
| H | 15.398918  | -2.538833 | 1.122605  |
| H | 12.998487  | -2.995819 | 1.578288  |
| H | 12.067811  | -2.108682 | -2.514357 |
| H | 14.476451  | -1.687966 | -2.962234 |
| H | -5.146874  | 0.161461  | -3.030150 |
| H | -0.191077  | 1.786025  | -0.266482 |
| H | 0.097687   | 1.213198  | -4.504444 |
| H | -0.085274  | -1.249214 | -4.163952 |
| H | 0.170628   | 3.690115  | -1.717940 |
| H | 0.898250   | 5.835797  | -2.316602 |
| H | 3.552575   | 6.587030  | -3.593758 |
| H | 1.183568   | 7.988273  | -2.946314 |
| H | 3.792397   | 6.477041  | -5.887250 |
| H | 2.527114   | 6.482411  | -6.921662 |
| H | -2.188840  | 2.908140  | -4.583689 |
| H | -2.130123  | 3.140760  | -1.630968 |
| H | -1.878888  | 5.251234  | -0.808346 |
| H | -3.256564  | 7.165310  | -2.558679 |
| H | -5.635370  | 7.749789  | 2.828355  |
| H | -2.332665  | 8.875019  | 0.308313  |
| H | -2.801483  | 9.806434  | 2.298102  |
| H | -6.650079  | 5.285357  | 0.545484  |
| H | -6.204797  | 7.540971  | -1.596228 |
| H | -7.412347  | 4.991351  | -3.675444 |
| H | -6.418310  | 2.718050  | -3.673877 |
| H | -3.915711  | 3.858143  | -0.382238 |



H            -3.557071   1.817533   -1.319257

Table S4. Cartesian coordinates for CEremo-PG complex

|   | <i>x</i>  | <i>y</i>  | <i>z</i>  |
|---|-----------|-----------|-----------|
| C | 2.616910  | 6.853786  | 4.982632  |
| C | 3.114222  | 5.594022  | 4.293106  |
| O | 4.276137  | 5.226634  | 4.354195  |
| N | 2.157440  | 4.909300  | 3.591237  |
| C | 2.496038  | 3.789015  | 2.705256  |
| C | 2.880682  | 2.526834  | 3.510838  |
| C | 3.348654  | 1.374229  | 2.618797  |
| C | 3.580814  | 0.065805  | 3.381429  |
| C | 4.120268  | -1.021574 | 2.446310  |
| N | 4.223171  | -2.342592 | 3.062777  |
| C | 1.307729  | 3.504021  | 1.770969  |
| O | 1.453494  | 3.424804  | 0.547038  |
| N | 0.133441  | 3.340198  | 2.409262  |
| C | -1.121531 | 2.915099  | 1.798325  |
| C | -2.095991 | 4.090212  | 1.618688  |
| C | -1.729437 | 1.866916  | 2.756329  |
| O | -1.325532 | 1.794261  | 3.920133  |
| N | -2.720436 | 1.123122  | 2.247582  |
| C | -3.514643 | 0.214574  | 3.067540  |
| C | -2.845764 | -1.160084 | 3.219191  |
| C | -4.947489 | 0.078414  | 2.501744  |
| O | -5.751534 | -0.546092 | 3.235000  |
| O | -5.201285 | 0.591702  | 1.379274  |
| N | 6.904868  | -1.187042 | -1.596736 |
| C | 5.927285  | -1.954586 | -0.828511 |
| C | 6.565394  | -3.102505 | -0.041001 |
| O | 5.885979  | -4.002177 | 0.468266  |
| N | 7.907327  | -3.033606 | 0.043474  |
| C | 8.751017  | -4.101864 | 0.543309  |
| C | 9.771711  | -3.713896 | 1.620302  |
| O | 10.846644 | -4.285387 | 1.664765  |
| N | 9.389977  | -2.750448 | 2.506358  |
| C | 10.265938 | -2.356848 | 3.604884  |
| C | 10.014844 | -3.149550 | 4.902811  |
| O | 10.887382 | -3.795765 | 5.454214  |
| N | 8.731933  | -3.071099 | 5.355242  |
| C | 8.210673  | -3.914827 | 6.417856  |

|   |           |           |           |
|---|-----------|-----------|-----------|
| C | 6.762753  | -4.311055 | 6.103833  |
| O | 5.896180  | -4.310391 | 6.953780  |
| N | 6.527882  | -4.624279 | 4.777867  |
| C | 5.263813  | -4.231936 | 4.187353  |
| C | 5.343565  | -2.788189 | 3.648936  |
| O | 6.373865  | -2.112682 | 3.763973  |
| H | -3.603641 | 0.660330  | 4.060650  |
| H | -1.868458 | -1.047029 | 3.692885  |
| H | -3.471892 | -1.803222 | 3.839581  |
| H | -2.709561 | -1.631259 | 2.241500  |
| H | -3.012044 | 1.249493  | 1.281130  |
| H | -0.913663 | 2.462812  | 0.830303  |
| H | -1.635684 | 4.884448  | 1.029981  |
| H | -2.996276 | 3.749064  | 1.106645  |
| H | -2.381475 | 4.502793  | 2.590037  |
| H | 0.133472  | 3.197372  | 3.416345  |
| H | 3.335826  | 4.075367  | 2.067480  |
| H | 1.271349  | 5.366857  | 3.437725  |
| H | 1.580983  | 6.762103  | 5.317797  |
| H | 2.678541  | 7.694389  | 4.285030  |
| H | 3.261596  | 7.056953  | 5.836806  |
| H | 3.676574  | 2.813459  | 4.200556  |
| H | 2.021899  | 2.209425  | 4.112291  |
| H | 2.606106  | 1.188817  | 1.834976  |
| H | 4.271107  | 1.671851  | 2.104666  |
| H | 4.290393  | 0.218824  | 4.201036  |
| H | 2.640331  | -0.273160 | 3.828678  |
| H | 3.463592  | -1.125503 | 1.579044  |
| H | 5.114276  | -0.733931 | 2.095994  |
| H | 3.516673  | -3.029674 | 2.818201  |
| H | 4.980393  | -4.899882 | 3.371913  |
| H | 4.495916  | -4.295783 | 4.959592  |
| H | 7.320202  | -4.446140 | 4.175931  |
| H | 8.860018  | -4.790538 | 6.507863  |
| H | 8.191401  | -3.411531 | 7.387249  |
| H | 8.052528  | -2.502193 | 4.855708  |
| H | 11.293198 | -2.557492 | 3.309429  |
| H | 10.141147 | -1.286743 | 3.792591  |
| H | 8.466370  | -2.344075 | 2.434447  |
| H | 8.098044  | -4.879886 | 0.946200  |
| H | 9.334628  | -4.545978 | -0.266097 |
| H | 8.300606  | -2.254248 | -0.481800 |
| H | 5.446272  | -1.297591 | -0.100922 |
| H | 5.118113  | -2.395428 | -1.422687 |
| H | 7.000182  | -1.559539 | -2.535253 |
| H | 6.627406  | -0.210092 | -1.690171 |

|    |            |           |           |
|----|------------|-----------|-----------|
| N  | -8.873956  | 1.281493  | 5.830220  |
| C  | -8.253208  | 1.311081  | 4.503888  |
| C  | -9.114418  | 0.570786  | 3.463131  |
| O  | -10.327376 | 0.744480  | 3.433014  |
| C  | -8.104597  | 2.767297  | 4.018351  |
| C  | -7.172308  | 3.652409  | 4.864213  |
| C  | -7.317785  | 5.118264  | 4.428151  |
| C  | -5.707180  | 3.206766  | 4.762139  |
| H  | -5.056631  | 3.859362  | 5.353465  |
| H  | -5.366203  | 3.241567  | 3.722378  |
| H  | -5.564853  | 2.186408  | 5.125894  |
| H  | -6.665469  | 5.772424  | 5.016660  |
| H  | -8.347523  | 5.468835  | 4.554954  |
| H  | -7.054461  | 5.232767  | 3.372040  |
| C  | -8.878911  | -0.042016 | 6.447426  |
| N  | -8.443733  | -0.248374 | 2.589965  |
| C  | -9.150733  | -0.829259 | 1.464690  |
| C  | -8.807310  | -0.282506 | 0.069487  |
| O  | -9.544911  | -0.590961 | -0.862024 |
| C  | -9.156634  | -2.398049 | 1.490826  |
| O  | -9.421998  | -2.845106 | 2.810456  |
| C  | -7.906720  | -3.041836 | 0.908300  |
| C  | -6.720267  | -3.141108 | 1.640166  |
| C  | -7.934655  | -3.525901 | -0.400679 |
| C  | -5.565295  | -3.625673 | 1.041305  |
| C  | -6.779964  | -4.028689 | -0.990374 |
| Cl | -6.837256  | -4.615018 | -2.646644 |
| C  | -5.577275  | -4.040551 | -0.286869 |
| O  | -4.388549  | -4.403266 | -0.903763 |
| N  | -7.739457  | 0.552977  | -0.064814 |
| C  | -7.572577  | 1.293610  | -1.304190 |
| C  | -6.232864  | 1.172728  | -2.049495 |
| O  | -6.159951  | 1.667826  | -3.174838 |
| C  | -7.960131  | 2.794514  | -1.167672 |
| C  | -6.967721  | 3.635756  | -0.370505 |
| O  | -7.132238  | 3.911615  | 0.806493  |
| N  | -5.887840  | 4.072782  | -1.084951 |
| H  | -5.131934  | 4.500733  | -0.572817 |
| H  | -5.701704  | 3.716812  | -2.011078 |
| N  | -5.196427  | 0.529500  | -1.461033 |
| C  | -3.956186  | 0.357617  | -2.201197 |
| C  | -2.934418  | 1.467234  | -1.868250 |
| O  | -2.618884  | 1.729536  | -0.713559 |
| C  | -3.337526  | -1.027087 | -1.966708 |
| C  | -4.140408  | -2.070573 | -1.523531 |
| C  | -1.988632  | -1.269730 | -2.230693 |

|    |           |           |           |
|----|-----------|-----------|-----------|
| C  | -3.617400 | -3.352870 | -1.352300 |
| C  | -1.461051 | -2.542445 | -2.030599 |
| C  | -2.268175 | -3.609497 | -1.620021 |
| O  | -1.735443 | -4.867756 | -1.408919 |
| N  | -2.375905 | 2.082294  | -2.939593 |
| C  | -1.114221 | 2.807329  | -2.835730 |
| C  | -0.295295 | 2.430661  | -4.097129 |
| O  | -0.887196 | 2.117156  | -5.124233 |
| C  | -1.164277 | 4.334294  | -2.783929 |
| C  | -0.440487 | 4.996312  | -1.793449 |
| C  | -0.180513 | 6.371643  | -1.847863 |
| C  | -1.539486 | 6.468033  | -3.865360 |
| C  | -1.729246 | 5.095318  | -3.816047 |
| C  | -0.737895 | 7.104813  | -2.910033 |
| O  | -0.522330 | 8.440099  | -3.049587 |
| N  | 1.055138  | 2.513941  | -4.036435 |
| C  | 1.888254  | 2.890154  | -2.909386 |
| C  | 2.365520  | 4.350643  | -3.112852 |
| O  | 2.435536  | 4.821578  | -4.238900 |
| C  | 3.033565  | 1.862383  | -2.691726 |
| O  | 3.937776  | 1.977677  | -3.781647 |
| C  | 2.409622  | 0.482625  | -2.541776 |
| C  | 2.165565  | -0.341396 | -3.642091 |
| C  | 1.891366  | 0.117184  | -1.298449 |
| C  | 1.346061  | -1.458594 | -3.517042 |
| C  | 1.080806  | -1.004959 | -1.169810 |
| Cl | 0.420292  | -1.407619 | 0.398242  |
| C  | 0.760979  | -1.774169 | -2.294547 |
| O  | -0.117055 | -2.837287 | -2.227282 |
| N  | 2.581248  | 5.032801  | -1.973778 |
| C  | 2.888971  | 6.459163  | -1.973236 |
| C  | 4.449969  | 6.756021  | -1.989843 |
| C  | 2.083939  | 7.139472  | -0.858093 |
| C  | 2.753023  | 7.819230  | 0.159464  |
| C  | 0.666221  | 7.061402  | -0.815240 |
| C  | 2.052875  | 8.404865  | 1.211554  |
| O  | 2.706582  | 9.074117  | 2.217023  |
| C  | -0.009449 | 7.659939  | 0.268680  |
| O  | -1.371162 | 7.606550  | 0.374451  |
| C  | 0.668757  | 8.324829  | 1.286607  |
| O  | 4.761852  | 7.951214  | -1.919594 |
| O  | 5.181436  | 5.738995  | -2.113657 |
| C  | -1.516690 | -5.618482 | -2.572915 |
| C  | -0.869077 | -6.955653 | -2.208143 |
| O  | 0.473648  | -6.781454 | -1.753904 |
| C  | -0.799895 | -7.850630 | -3.458251 |

|   |           |           |           |
|---|-----------|-----------|-----------|
| O | -0.298348 | -9.141035 | -3.135054 |
| C | -2.143328 | -7.992314 | -4.163510 |
| O | -2.035750 | -8.705714 | -5.391799 |
| C | -2.739177 | -6.593042 | -4.394698 |
| O | -2.779453 | -5.866741 | -3.168245 |
| C | -4.173434 | -6.635298 | -4.912321 |
| O | -5.061634 | -7.219445 | -3.978144 |
| H | -0.880538 | -5.057610 | -3.274202 |
| H | -4.481561 | -5.614679 | -5.173392 |
| H | -4.200562 | -7.253335 | -5.811290 |
| C | 0.829392  | -7.433414 | -0.534001 |
| C | 2.344207  | -7.654348 | -0.528978 |
| C | 3.178917  | -6.388152 | -0.236577 |
| N | 4.589819  | -6.794685 | -0.033243 |
| C | 3.193326  | -5.447422 | -1.454553 |
| C | 2.549302  | -5.706284 | 1.011589  |
| C | 1.035861  | -5.476113 | 0.848317  |
| O | 0.390996  | -6.744593 | 0.601783  |
| C | 0.380603  | -4.911283 | 2.095827  |
| H | 0.308338  | -8.394749 | -0.487935 |
| H | 2.666720  | -8.083060 | -1.481419 |
| H | 2.540981  | -8.399789 | 0.246337  |
| H | 3.784364  | -4.554254 | -1.243219 |
| H | 2.191639  | -5.142851 | -1.746583 |
| H | 3.655265  | -5.968587 | -2.296734 |
| H | -0.691919 | -4.802990 | 1.927204  |
| H | 0.797281  | -3.932555 | 2.333736  |
| H | 0.532629  | -5.582026 | 2.946657  |
| O | 3.167865  | -4.461112 | 1.342788  |
| H | 5.109738  | -6.022740 | 0.332523  |
| H | 4.627194  | -7.557524 | 0.612265  |
| C | 5.186981  | 1.305957  | -3.629953 |
| C | 6.113044  | 1.716515  | -4.769417 |
| C | 6.742178  | 3.139523  | -4.673128 |
| N | 7.932555  | 3.226324  | -5.544815 |
| C | 5.771778  | 4.222402  | -5.152138 |
| C | 7.225298  | 3.391114  | -3.206615 |
| C | 6.213131  | 2.915300  | -2.145355 |
| O | 5.786900  | 1.535428  | -2.378012 |
| C | 6.789959  | 2.951439  | -0.741923 |
| H | 5.007194  | 0.223026  | -3.646289 |
| H | 5.587908  | 1.608317  | -5.724327 |
| H | 6.929660  | 0.984218  | -4.767128 |
| H | 6.270307  | 5.189559  | -5.106883 |
| H | 4.859090  | 4.269981  | -4.564939 |
| H | 5.486236  | 4.024338  | -6.192477 |

|   |            |           |           |
|---|------------|-----------|-----------|
| H | 6.039330   | 2.642430  | -0.009641 |
| H | 7.102172   | 3.968730  | -0.510765 |
| H | 7.657347   | 2.287630  | -0.658733 |
| O | 7.580969   | 4.727935  | -2.953827 |
| H | -7.489230  | 3.561442  | 5.909243  |
| H | -7.759320  | 2.775725  | 2.979447  |
| H | -9.109691  | 3.206862  | 4.006305  |
| H | -7.273932  | 0.831088  | 4.567722  |
| H | -9.359213  | 0.017559  | 7.428502  |
| H | -9.403309  | -0.818177 | 5.863576  |
| H | -7.848949  | -0.376121 | 6.601139  |
| H | -9.836125  | 1.588641  | 5.708025  |
| H | -7.420709  | -0.364021 | 2.718485  |
| H | -10.192896 | -0.536068 | 1.612117  |
| H | -9.019742  | -2.198434 | 3.405815  |
| H | -10.004276 | -2.704409 | 0.875522  |
| H | -6.670339  | -2.779476 | 2.657817  |
| H | -4.625396  | -3.644679 | 1.579477  |
| H | -8.846034  | -3.471893 | -0.982474 |
| H | -5.180565  | -1.884682 | -1.307370 |
| H | -1.338526  | -0.475233 | -2.567663 |
| H | -4.231093  | 0.449294  | -3.255122 |
| H | -5.187475  | 0.383304  | -0.445253 |
| H | -8.294478  | 0.851245  | -1.993880 |
| H | -7.091185  | 0.706634  | 0.709700  |
| H | -8.058960  | 3.196788  | -2.177834 |
| H | -8.923483  | 2.853909  | -0.662695 |
| H | -5.068817  | -6.647556 | -3.200036 |
| H | -2.112093  | -6.059179 | -5.131342 |
| H | -2.835006  | -8.566806 | -3.544286 |
| H | -1.259459  | -8.378012 | -5.858355 |
| H | 0.611416   | -9.018757 | -2.845203 |
| H | -0.106285  | -7.352366 | -4.159591 |
| H | -1.484294  | -7.422070 | -1.432985 |
| H | 0.848230   | -4.808465 | 0.003421  |
| H | 2.666221   | -6.395763 | 1.860266  |
| H | 4.053068   | -4.388932 | 0.945755  |
| H | -2.610893  | 1.788170  | -3.880891 |
| H | 2.064190   | 0.745131  | -0.432318 |
| H | 2.566061   | -0.069837 | -4.610331 |
| H | 1.098375   | -2.070793 | -4.375909 |
| H | 3.540508   | 2.129833  | -1.761305 |
| H | 5.340127   | 3.568619  | -2.189139 |
| H | 8.142202   | 2.793773  | -3.077345 |
| H | 6.772580   | 5.239453  | -2.706336 |
| H | 8.587606   | 2.481076  | -5.320903 |

|   |           |          |           |
|---|-----------|----------|-----------|
| H | 7.653245  | 3.093616 | -6.513691 |
| H | 1.512289  | 2.554846 | -4.938847 |
| H | 1.297058  | 2.846361 | -1.998641 |
| H | 2.489738  | 4.558986 | -1.083022 |
| H | 2.536571  | 6.834558 | -2.939071 |
| H | 0.120307  | 8.782253 | 2.099641  |
| H | 3.826283  | 7.942688 | 0.078382  |
| H | 3.649547  | 9.064178 | 2.016838  |
| H | -1.711193 | 7.098599 | -0.375328 |
| H | 0.106941  | 8.712781 | -2.365757 |
| H | -1.958349 | 7.063800 | -4.667348 |
| H | -2.287326 | 4.605338 | -4.606111 |
| H | -0.008894 | 4.431112 | -0.976222 |
| H | -0.634005 | 2.459875 | -1.921828 |

Table S5. Cartesian coordinates for Des-CEremo-PG complex

|   | <i>x</i>  | <i>y</i>  | <i>z</i> |
|---|-----------|-----------|----------|
| C | 3.956268  | 6.065362  | 5.362953 |
| C | 4.133964  | 4.811579  | 4.522584 |
| O | 5.214648  | 4.263022  | 4.381303 |
| N | 2.987515  | 4.351809  | 3.929994 |
| C | 3.006430  | 3.277942  | 2.929445 |
| C | 3.281765  | 1.902966  | 3.580326 |
| C | 3.420663  | 0.777637  | 2.551941 |
| C | 3.533440  | -0.615058 | 3.180559 |
| C | 3.747067  | -1.683483 | 2.103210 |
| N | 3.711249  | -3.055017 | 2.606520 |
| C | 1.668873  | 3.268703  | 2.169807 |
| O | 1.627541  | 3.279690  | 0.935424 |
| N | 0.584140  | 3.232941  | 2.966853 |
| C | -0.797035 | 3.066829  | 2.526773 |
| C | -1.575529 | 4.391275  | 2.576998 |
| C | -1.433173 | 2.043591  | 3.493377 |
| O | -0.889300 | 1.802788  | 4.574614 |
| N | -2.596075 | 1.513453  | 3.092449 |
| C | -3.409765 | 0.669269  | 3.960675 |

|   |           |           |           |
|---|-----------|-----------|-----------|
| C | -2.966918 | -0.801094 | 3.915921  |
| C | -4.909691 | 0.811013  | 3.611617  |
| O | -5.697309 | 0.255627  | 4.414963  |
| O | -5.227271 | 1.457928  | 2.577954  |
| N | 5.874315  | -1.912656 | -2.318316 |
| C | 4.898166  | -2.584774 | -1.463710 |
| C | 5.437549  | -3.885356 | -0.861526 |
| O | 4.694154  | -4.710409 | -0.316529 |
| N | 6.770488  | -4.035115 | -0.977774 |
| C | 7.483865  | -5.263244 | -0.685175 |
| C | 8.695002  | -5.139548 | 0.247614  |
| O | 9.654185  | -5.873719 | 0.089437  |
| N | 8.607644  | -4.213189 | 1.244246  |
| C | 9.681477  | -4.063290 | 2.220667  |
| C | 9.483781  | -4.922074 | 3.485360  |
| O | 10.303413 | -5.744349 | 3.852824  |
| N | 8.307900  | -4.685622 | 4.131968  |
| C | 7.805234  | -5.530875 | 5.202300  |
| C | 6.281917  | -5.665519 | 5.086296  |
| O | 5.554574  | -5.606936 | 6.056296  |
| N | 5.815597  | -5.815850 | 3.793468  |
| C | 4.565761  | -5.178467 | 3.429926  |
| C | 4.811316  | -3.721913 | 2.984045  |
| O | 5.946324  | -3.229152 | 2.986175  |
| H | -3.283547 | 1.030952  | 4.983485  |
| H | -1.928255 | -0.885933 | 4.241919  |
| H | -3.599738 | -1.392322 | 4.579649  |
| H | -3.049196 | -1.196564 | 2.899422  |
| H | -2.993874 | 1.771519  | 2.192341  |
| H | -0.804855 | 2.677848  | 1.510176  |
| H | -1.074736 | 5.154140  | 1.979911  |
| H | -2.582695 | 4.243248  | 2.186115  |
| H | -1.649667 | 4.753038  | 3.606015  |
| H | 0.700272  | 3.000573  | 3.950283  |
| H | 3.785384  | 3.486460  | 2.192051  |
| H | 2.178306  | 4.954354  | 3.944241  |
| H | 2.976515  | 6.106578  | 5.844898  |
| H | 4.060632  | 6.946098  | 4.722270  |
| H | 4.738400  | 6.086432  | 6.120802  |
| H | 4.202607  | 1.997479  | 4.158621  |
| H | 2.474000  | 1.670188  | 4.282702  |
| H | 2.555797  | 0.782910  | 1.879548  |
| H | 4.299386  | 0.973031  | 1.924649  |
| H | 4.365665  | -0.650299 | 3.891074  |
| H | 2.620868  | -0.842190 | 3.741862  |
| H | 2.968090  | -1.603885 | 1.340954  |



|    |           |           |           |
|----|-----------|-----------|-----------|
| H  | 4.716734  | -1.524039 | 1.625890  |
| H  | 2.872277  | -3.597968 | 2.426609  |
| H  | 4.063472  | -5.716654 | 2.624021  |
| H  | 3.913065  | -5.191667 | 4.303944  |
| H  | 6.535028  | -5.709606 | 3.091354  |
| H  | 8.304291  | -6.501855 | 5.133313  |
| H  | 8.005869  | -5.121339 | 6.194986  |
| H  | 7.670974  | -3.974307 | 3.781060  |
| H  | 10.609170 | -4.394271 | 1.759523  |
| H  | 9.765642  | -3.008483 | 2.496766  |
| H  | 7.764574  | -3.662563 | 1.341218  |
| H  | 6.771920  | -5.963084 | -0.240907 |
| H  | 7.866178  | -5.717409 | -1.601989 |
| H  | 7.212192  | -3.282191 | -1.503115 |
| H  | 4.640373  | -1.929822 | -0.628856 |
| H  | 3.951738  | -2.837599 | -1.956154 |
| H  | 5.774167  | -2.208259 | -3.283325 |
| H  | 5.754720  | -0.899940 | -2.302481 |
| N  | -8.364361 | 1.028210  | 4.208590  |
| C  | -9.308499 | 0.670146  | 3.167478  |
| C  | -9.075564 | 1.281485  | 1.776265  |
| O  | -9.976826 | 1.178452  | 0.949208  |
| C  | -9.574265 | -0.874186 | 3.088566  |
| O  | -9.724781 | -1.392786 | 4.400092  |
| C  | -8.543692 | -1.649603 | 2.280649  |
| C  | -7.300685 | -1.999521 | 2.815107  |
| C  | -8.834408 | -2.001857 | 0.961586  |
| C  | -6.338282 | -2.602012 | 2.016244  |
| C  | -7.874066 | -2.623063 | 0.170578  |
| Cl | -8.258933 | -3.039610 | -1.493352 |
| C  | -6.604470 | -2.886965 | 0.680482  |
| O  | -5.591157 | -3.373251 | -0.133096 |
| N  | -7.911711 | 1.948461  | 1.537585  |
| C  | -7.796805 | 2.763859  | 0.339937  |
| C  | -6.613365 | 2.503521  | -0.606961 |
| O  | -6.615561 | 3.081728  | -1.694392 |
| C  | -7.903797 | 4.288101  | 0.634535  |
| C  | -6.683016 | 4.887538  | 1.326207  |
| O  | -6.633467 | 5.077158  | 2.530399  |
| N  | -5.655097 | 5.213698  | 0.486821  |
| H  | -4.774232 | 5.469660  | 0.905604  |
| H  | -5.662110 | 4.919018  | -0.478677 |
| N  | -5.628125 | 1.655176  | -0.227692 |
| C  | -4.549617 | 1.359762  | -1.157818 |
| C  | -3.319666 | 2.260911  | -0.910300 |
| O  | -2.807011 | 2.364178  | 0.197940  |

|    |           |           |           |
|----|-----------|-----------|-----------|
| C  | -4.145943 | -0.120187 | -1.113923 |
| C  | -5.043194 | -1.061343 | -0.624988 |
| C  | -2.907045 | -0.545631 | -1.595802 |
| C  | -4.724460 | -2.419850 | -0.622024 |
| C  | -2.578222 | -1.898064 | -1.564427 |
| C  | -3.488109 | -2.858758 | -1.108578 |
| O  | -3.150297 | -4.198783 | -1.066159 |
| N  | -2.820288 | 2.876247  | -2.010298 |
| C  | -1.452700 | 3.382561  | -2.051059 |
| C  | -0.892287 | 2.999181  | -3.444832 |
| O  | -1.665506 | 2.877124  | -4.388659 |
| C  | -1.237730 | 4.887395  | -1.889596 |
| C  | -0.282324 | 5.334929  | -0.978495 |
| C  | 0.194949  | 6.651854  | -0.979145 |
| C  | -1.395763 | 7.143226  | -2.755259 |
| C  | -1.804783 | 5.818361  | -2.770147 |
| C  | -0.373562 | 7.556982  | -1.892358 |
| O  | 0.041797  | 8.849236  | -1.972899 |
| N  | 0.448056  | 2.864408  | -3.584856 |
| C  | 1.481122  | 3.001303  | -2.574959 |
| C  | 2.164028  | 4.381606  | -2.749915 |
| O  | 2.154845  | 4.936567  | -3.839227 |
| C  | 2.456403  | 1.791582  | -2.603770 |
| O  | 3.206579  | 1.863055  | -3.808321 |
| C  | 1.636476  | 0.518491  | -2.453833 |
| C  | 1.106741  | -0.153352 | -3.557136 |
| C  | 1.242260  | 0.126662  | -1.173575 |
| C  | 0.136624  | -1.135372 | -3.384327 |
| C  | 0.280539  | -0.861948 | -0.998919 |
| Cl | -0.213586 | -1.297771 | 0.620679  |
| C  | -0.317326 | -1.465810 | -2.111085 |
| O  | -1.343513 | -2.380220 | -1.982709 |
| N  | 2.647666  | 4.914822  | -1.613630 |
| C  | 3.187760  | 6.269456  | -1.563921 |
| C  | 4.758734  | 6.318862  | -1.797833 |
| C  | 2.671587  | 6.962632  | -0.296044 |
| C  | 3.580353  | 7.433694  | 0.651274  |
| C  | 1.280861  | 7.103602  | -0.043328 |
| C  | 3.141855  | 8.023117  | 1.834647  |
| O  | 4.032167  | 8.487354  | 2.771678  |
| C  | 0.872849  | 7.698981  | 1.168574  |
| O  | -0.450320 | 7.849726  | 1.476471  |
| C  | 1.788070  | 8.153961  | 2.113869  |
| O  | 5.273735  | 7.439134  | -1.695579 |
| O  | 5.284439  | 5.215574  | -2.099666 |
| C  | -3.224911 | -4.865091 | -2.297742 |

|   |           |           |           |
|---|-----------|-----------|-----------|
| C | -2.766870 | -6.314708 | -2.126587 |
| O | -1.364020 | -6.394773 | -1.871258 |
| C | -3.023674 | -7.091641 | -3.430031 |
| O | -2.706104 | -8.468634 | -3.274499 |
| C | -4.456672 | -6.956583 | -3.930584 |
| O | -4.642454 | -7.562933 | -5.206136 |
| C | -4.835176 | -5.466174 | -3.973714 |
| O | -4.581800 | -4.857491 | -2.709345 |
| C | -6.313997 | -5.236252 | -4.268736 |
| O | -7.149007 | -5.757122 | -3.251749 |
| H | -2.607389 | -4.348955 | -3.048301 |
| H | -6.479501 | -4.160497 | -4.410595 |
| H | -6.569400 | -5.757804 | -5.192643 |
| C | -0.956698 | -7.202899 | -0.766365 |
| C | 0.485196  | -7.657481 | -1.006770 |
| C | 1.553269  | -6.569395 | -0.760233 |
| N | 2.890152  | -7.208360 | -0.801771 |
| C | 1.555981  | -5.535319 | -1.900112 |
| C | 1.227056  | -5.914250 | 0.612228  |
| C | -0.233962 | -5.436357 | 0.697001  |
| O | -1.110765 | -6.560558 | 0.466653  |
| C | -0.604960 | -4.892247 | 2.064840  |
| H | -1.620349 | -8.071087 | -0.706359 |
| H | 0.595390  | -8.042623 | -2.023861 |
| H | 0.659817  | -8.492121 | -0.322371 |
| H | 2.312284  | -4.768601 | -1.721543 |
| H | 0.588981  | -5.052519 | -2.015162 |
| H | 1.802044  | -6.043247 | -2.835918 |
| H | -1.656906 | -4.602668 | 2.069046  |
| H | -0.000741 | -4.016547 | 2.301902  |
| H | -0.450951 | -5.653316 | 2.835537  |
| O | 2.086052  | -4.816585 | 0.928495  |
| H | 3.578161  | -6.563835 | -0.468258 |
| H | 2.888230  | -8.023341 | -0.222287 |
| C | 4.333910  | 0.993278  | -3.894025 |
| C | 5.148140  | 1.356240  | -5.130882 |
| C | 6.014659  | 2.648585  | -5.035890 |
| N | 7.069680  | 2.627379  | -6.070709 |
| C | 5.182978  | 3.909004  | -5.287692 |
| C | 6.732443  | 2.686663  | -3.646394 |
| C | 5.812337  | 2.280120  | -2.477941 |
| O | 5.132111  | 1.010919  | -2.735370 |
| C | 6.576588  | 2.097410  | -1.179406 |
| H | 3.974190  | -0.042160 | -3.955660 |
| H | 4.484624  | 1.419071  | -5.999862 |
| H | 5.822337  | 0.508156  | -5.302163 |

|   |            |           |           |
|---|------------|-----------|-----------|
| H | 5.838329   | 4.778107  | -5.253831 |
| H | 4.381962   | 4.044913  | -4.566603 |
| H | 4.726297   | 3.853789  | -6.283414 |
| H | 5.893984   | 1.844046  | -0.363914 |
| H | 7.084400   | 3.027985  | -0.930509 |
| H | 7.323098   | 1.301363  | -1.274029 |
| O | 7.339373   | 3.922719  | -3.361277 |
| H | -7.449771  | 1.115119  | 3.813659  |
| H | -8.634637  | 1.899409  | 4.618424  |
| H | -10.255776 | 1.107982  | 3.491155  |
| H | -9.140712  | -0.874018 | 4.969470  |
| H | -10.538575 | -0.986809 | 2.590194  |
| H | -7.049611  | -1.744533 | 3.835316  |
| H | -5.349347  | -2.816766 | 2.402625  |
| H | -9.795696  | -1.753158 | 0.530206  |
| H | -5.996983  | -0.735619 | -0.241063 |
| H | -2.185959  | 0.164843  | -1.973521 |
| H | -4.949116  | 1.589079  | -2.149055 |
| H | -5.502643  | 1.417305  | 0.762730  |
| H | -8.671607  | 2.504607  | -0.260070 |
| H | -7.145482  | 1.927546  | 2.213007  |
| H | -8.073174  | 4.791359  | -0.319436 |
| H | -8.763709  | 4.451055  | 1.283052  |
| H | -6.951658  | -5.264563 | -2.444903 |
| H | -4.235961  | -4.971956 | -4.759576 |
| H | -5.142089  | -7.469945 | -3.253412 |
| H | -3.894699  | -7.319444 | -5.762252 |
| H | -1.757383  | -8.517067 | -3.118884 |
| H | -2.360607  | -6.646057 | -4.193599 |
| H | -3.337812  | -6.747964 | -1.300014 |
| H | -0.422412  | -4.673306 | -0.062636 |
| H | 1.343356   | -6.688060 | 1.384883  |
| H | 2.906827   | -4.847770 | 0.407164  |
| H | -3.229997  | 2.709617  | -2.922517 |
| H | 1.636946   | 0.638177  | -0.303550 |
| H | 1.408525   | 0.139457  | -4.554542 |
| H | -0.327464  | -1.620358 | -4.234738 |
| H | 3.125520   | 1.890450  | -1.745451 |
| H | 5.064065   | 3.063135  | -2.344313 |
| H | 7.544858   | 1.944037  | -3.698640 |
| H | 6.670851   | 4.529593  | -2.959808 |
| H | 7.614860   | 1.771596  | -5.999745 |
| H | 6.640007   | 2.628946  | -6.992514 |
| H | 0.775525   | 2.915508  | -4.541496 |
| H | 1.023510   | 2.967560  | -1.589901 |
| H | 2.602656   | 4.381861  | -0.753254 |

|   |           |          |           |
|---|-----------|----------|-----------|
| H | 2.772569  | 6.781879 | -2.437411 |
| H | 1.442813  | 8.615386 | 3.029807  |
| H | 4.637227  | 7.394708 | 0.416329  |
| H | 4.922898  | 8.348414 | 2.430137  |
| H | -0.971832 | 7.471749 | 0.754694  |
| H | 0.796869  | 8.956625 | -1.375996 |
| H | -1.815987 | 7.867821 | -3.442241 |
| H | -2.541677 | 5.495826 | -3.497260 |
| H | 0.157580  | 4.637015 | -0.276366 |
| H | -0.915301 | 2.882371 | -1.246347 |

Table S6. Cartesian coordinates for Vanco-PG complex

|   | x         | y         | z         |
|---|-----------|-----------|-----------|
| C | 2.034396  | 7.972911  | 3.761789  |
| C | 2.708747  | 6.764658  | 3.133183  |
| O | 3.921143  | 6.630815  | 3.102581  |
| N | 1.848650  | 5.843130  | 2.596607  |
| C | 2.323434  | 4.720870  | 1.778218  |
| C | 3.018080  | 3.644048  | 2.643051  |
| C | 3.625048  | 2.513937  | 1.807782  |
| C | 4.176192  | 1.358808  | 2.650037  |
| C | 4.836347  | 0.301385  | 1.759025  |
| N | 5.251067  | -0.905519 | 2.471133  |
| C | 1.138186  | 4.122077  | 1.001799  |
| O | 1.189870  | 3.945258  | -0.219509 |
| N | 0.079278  | 3.807287  | 1.771754  |
| C | -1.115336 | 3.092637  | 1.334626  |
| C | -2.314385 | 4.038330  | 1.159470  |
| C | -1.418891 | 2.053853  | 2.436802  |
| O | -0.909083 | 2.179543  | 3.553564  |
| N | -2.283972 | 1.088214  | 2.100191  |
| C | -2.808991 | 0.136439  | 3.073348  |
| C | -1.871386 | -1.064541 | 3.269883  |
| C | -4.230398 | -0.324809 | 2.675144  |
| O | -4.828609 | -1.010014 | 3.539319  |
| O | -4.676998 | 0.012377  | 1.546131  |
| N | 7.237008  | 0.244622  | -2.525973 |
| C | 6.500607  | -0.609310 | -1.596739 |
| C | 7.418637  | -1.528717 | -0.786194 |
| O | 6.976978  | -2.482432 | -0.133712 |
| N | 8.722746  | -1.200163 | -0.849610 |

|   |           |           |           |
|---|-----------|-----------|-----------|
| C | 9.800818  | -2.032909 | -0.352501 |
| C | 10.814464 | -1.350292 | 0.574216  |
| O | 11.980759 | -1.701564 | 0.553623  |
| N | 10.328517 | -0.389316 | 1.410534  |
| C | 11.201593 | 0.273801  | 2.373343  |
| C | 11.225557 | -0.413089 | 3.753071  |
| O | 12.252988 | -0.822872 | 4.262412  |
| N | 9.996629  | -0.530969 | 4.329739  |
| C | 9.746416  | -1.342924 | 5.509087  |
| C | 8.383479  | -2.034903 | 5.384007  |
| O | 7.610966  | -2.109203 | 6.317315  |
| N | 8.100800  | -2.522465 | 4.121536  |
| C | 6.737754  | -2.438354 | 3.636211  |
| C | 6.483950  | -1.069127 | 2.971789  |
| O | 7.366694  | -0.203599 | 2.919966  |
| H | -2.897625 | 0.657992  | 4.028864  |
| H | -0.898243 | -0.721123 | 3.626747  |
| H | -2.301988 | -1.746165 | 4.005081  |
| H | -1.730303 | -1.600439 | 2.326832  |
| H | -2.677588 | 1.056575  | 1.162587  |
| H | -0.907162 | 2.589673  | 0.392008  |
| H | -2.072771 | 4.839606  | 0.460294  |
| H | -3.170635 | 3.482662  | 0.775863  |
| H | -2.590226 | 4.488255  | 2.116927  |
| H | 0.194950  | 3.772202  | 2.781707  |
| H | 3.031573  | 5.092440  | 1.033587  |
| H | 0.879770  | 6.107357  | 2.498944  |
| H | 1.070034  | 7.723188  | 4.210711  |
| H | 1.868104  | 8.733166  | 2.992751  |
| H | 2.698000  | 8.381191  | 4.523004  |
| H | 3.798582  | 4.145240  | 3.218318  |
| H | 2.294368  | 3.234806  | 3.356327  |
| H | 2.868489  | 2.111876  | 1.125069  |
| H | 4.422421  | 2.924887  | 1.176002  |
| H | 4.910057  | 1.726738  | 3.374428  |
| H | 3.363565  | 0.897155  | 3.220957  |
| H | 4.140314  | -0.013587 | 0.977676  |
| H | 5.719787  | 0.733035  | 1.282869  |
| H | 4.675544  | -1.734851 | 2.361502  |
| H | 6.522007  | -3.228568 | 2.914797  |
| H | 6.067580  | -2.565148 | 4.487612  |
| H | 8.787057  | -2.261798 | 3.426599  |
| H | 10.561126 | -2.066672 | 5.604247  |
| H | 9.712454  | -0.754512 | 6.428880  |
| H | 9.177550  | -0.154971 | 3.858023  |
| H | 12.218632 | 0.240508  | 1.989495  |

|    |           |           |           |
|----|-----------|-----------|-----------|
| H  | 10.884852 | 1.314897  | 2.481625  |
| H  | 9.340191  | -0.173677 | 1.402016  |
| H  | 9.351733  | -2.873866 | 0.181472  |
| H  | 10.388060 | -2.440745 | -1.178209 |
| H  | 8.907352  | -0.419454 | -1.477617 |
| H  | 5.964433  | 0.017261  | -0.880968 |
| H  | 5.745869  | -1.253713 | -2.062853 |
| H  | 7.322092  | -0.198534 | -3.434282 |
| H  | 6.765157  | 1.136866  | -2.672271 |
| N  | -8.012895 | 0.456400  | 6.284260  |
| C  | -7.527766 | 0.464606  | 4.902254  |
| C  | -8.313001 | -0.528345 | 4.024560  |
| O  | -9.534322 | -0.590067 | 4.107663  |
| C  | -7.712199 | 1.864451  | 4.281919  |
| C  | -6.903061 | 2.992008  | 4.946733  |
| C  | -7.372271 | 4.351057  | 4.405559  |
| C  | -5.393310 | 2.821876  | 4.729191  |
| H  | -4.835502 | 3.642946  | 5.191204  |
| H  | -5.157514 | 2.812237  | 3.660132  |
| H  | -5.021374 | 1.889832  | 5.161237  |
| H  | -6.813291 | 5.173696  | 4.864462  |
| H  | -8.435963 | 4.512827  | 4.609839  |
| H  | -7.229451 | 4.402953  | 3.321709  |
| C  | -7.702940 | -0.773155 | 7.008667  |
| N  | -7.572254 | -1.292697 | 3.158347  |
| C  | -8.245706 | -2.109704 | 2.167144  |
| C  | -8.139422 | -1.655731 | 0.702193  |
| O  | -8.879693 | -2.192342 | -0.116929 |
| C  | -7.939597 | -3.640265 | 2.326832  |
| O  | -7.995896 | -3.990016 | 3.700224  |
| C  | -6.642617 | -4.094217 | 1.672727  |
| C  | -5.400924 | -3.892051 | 2.281399  |
| C  | -6.688036 | -4.707932 | 0.419805  |
| C  | -4.229494 | -4.210057 | 1.607587  |
| C  | -5.512487 | -5.042838 | -0.243348 |
| Cl | -5.596550 | -5.797956 | -1.828601 |
| C  | -4.274653 | -4.755189 | 0.328092  |
| O  | -3.095877 | -4.949707 | -0.377482 |
| N  | -7.273232 | -0.652745 | 0.385790  |
| C  | -7.364068 | -0.026486 | -0.922638 |
| C  | -6.096733 | 0.030281  | -1.791868 |
| O  | -6.220967 | 0.410880  | -2.956576 |
| C  | -8.026856 | 1.380602  | -0.873983 |
| C  | -7.154582 | 2.471578  | -0.260022 |
| O  | -7.267460 | 2.832054  | 0.900066  |
| N  | -6.248391 | 3.027534  | -1.118683 |

|    |           |           |           |
|----|-----------|-----------|-----------|
| H  | -5.550247 | 3.640819  | -0.727155 |
| H  | -6.076807 | 2.618892  | -2.025680 |
| N  | -4.906630 | -0.341902 | -1.263317 |
| C  | -3.725915 | -0.353130 | -2.112652 |
| C  | -2.918251 | 0.957356  | -1.984518 |
| O  | -2.561631 | 1.392608  | -0.895916 |
| C  | -2.828171 | -1.564783 | -1.827900 |
| C  | -3.367751 | -2.689038 | -1.215695 |
| C  | -1.486043 | -1.575310 | -2.210862 |
| C  | -2.589113 | -3.825231 | -0.992244 |
| C  | -0.702324 | -2.698293 | -1.960107 |
| C  | -1.244226 | -3.849741 | -1.377755 |
| O  | -0.457374 | -4.956494 | -1.117863 |
| N  | -2.587293 | 1.552086  | -3.157025 |
| C  | -1.489350 | 2.508366  | -3.248481 |
| C  | -0.724891 | 2.163822  | -4.552527 |
| O  | -1.330192 | 1.639786  | -5.481274 |
| C  | -1.835078 | 3.995628  | -3.321506 |
| C  | -1.172949 | 4.881061  | -2.472515 |
| C  | -1.195237 | 6.267556  | -2.670545 |
| C  | -2.716468 | 5.896837  | -4.534631 |
| C  | -2.626576 | 4.525580  | -4.349270 |
| C  | -1.976440 | 6.768616  | -3.726519 |
| O  | -2.041583 | 8.098819  | -4.000832 |
| N  | 0.582615  | 2.505556  | -4.641622 |
| C  | 1.419761  | 3.146585  | -3.644564 |
| C  | 1.579905  | 4.641685  | -4.020380 |
| O  | 1.457549  | 4.998067  | -5.183431 |
| C  | 2.759867  | 2.380884  | -3.462226 |
| O  | 3.525408  | 2.550641  | -4.647109 |
| C  | 2.435918  | 0.931482  | -3.130847 |
| C  | 2.264671  | -0.033287 | -4.125413 |
| C  | 2.109942  | 0.605946  | -1.813363 |
| C  | 1.695782  | -1.265638 | -3.820408 |
| C  | 1.551073  | -0.629180 | -1.505322 |
| Cl | 1.121730  | -0.984172 | 0.152040  |
| C  | 1.292901  | -1.557207 | -2.520762 |
| O  | 0.651168  | -2.753745 | -2.271438 |
| N  | 1.754851  | 5.466592  | -2.972385 |
| C  | 1.773890  | 6.917609  | -3.125323 |
| C  | 3.238145  | 7.499540  | -3.331304 |
| C  | 0.950373  | 7.546155  | -1.993427 |
| C  | 1.557933  | 8.441427  | -1.113355 |
| C  | -0.414871 | 7.207584  | -1.795096 |
| C  | 0.850041  | 8.990709  | -0.046938 |
| O  | 1.443610  | 9.871573  | 0.823668  |



|   |           |           |           |
|---|-----------|-----------|-----------|
| C | -1.098642 | 7.777373  | -0.700814 |
| O | -2.408606 | 7.479968  | -0.448133 |
| C | -0.479208 | 8.659879  | 0.179927  |
| O | 3.312920  | 8.732795  | -3.395990 |
| O | 4.142366  | 6.631063  | -3.444650 |
| C | -0.196691 | -5.769196 | -2.230468 |
| C | 0.731258  | -6.915472 | -1.823713 |
| O | 2.047469  | -6.445596 | -1.529783 |
| C | 0.866878  | -7.906128 | -2.993648 |
| O | 1.639357  | -9.038525 | -2.616679 |
| C | -0.478240 | -8.370404 | -3.538977 |
| O | -0.339066 | -9.174236 | -4.706750 |
| C | -1.356297 | -7.139889 | -3.824096 |
| O | -1.432457 | -6.310983 | -2.666323 |
| C | -2.793431 | -7.504696 | -4.182392 |
| O | -3.464333 | -8.145491 | -3.113709 |
| H | 0.252910  | -5.174418 | -3.039892 |
| H | -3.318402 | -6.592951 | -4.495265 |
| H | -2.776017 | -8.206600 | -5.017784 |
| C | 2.629446  | -6.888932 | -0.303193 |
| C | 4.152669  | -6.819149 | -0.438928 |
| C | 4.743253  | -5.395142 | -0.344567 |
| N | 6.218857  | -5.505620 | -0.257118 |
| C | 4.465901  | -4.599929 | -1.632727 |
| C | 4.102271  | -4.718275 | 0.900532  |
| C | 2.564824  | -4.795183 | 0.878542  |
| O | 2.164054  | -6.180944 | 0.809836  |
| C | 1.921842  | -4.237514 | 2.135625  |
| H | 2.314369  | -7.921090 | -0.121093 |
| H | 4.469493  | -7.275901 | -1.380178 |
| H | 4.559257  | -7.429786 | 0.371829  |
| H | 4.885123  | -3.594494 | -1.561373 |
| H | 3.402308  | -4.521227 | -1.842481 |
| H | 4.946692  | -5.109309 | -2.471560 |
| H | 0.838532  | -4.351043 | 2.072263  |
| H | 2.156227  | -3.178571 | 2.244402  |
| H | 2.276550  | -4.775788 | 3.019573  |
| O | 4.489311  | -3.351450 | 1.057872  |
| H | 6.605966  | -4.615950 | -0.014973 |
| H | 6.461955  | -6.176697 | 0.443281  |
| H | -7.103826 | 2.951865  | 6.023247  |
| H | -7.466925 | 1.829952  | 3.215495  |
| H | -8.781447 | 2.103378  | 4.338476  |
| H | -6.471253 | 0.186704  | 4.903158  |
| H | -8.098505 | -0.703644 | 8.026236  |
| H | -8.112529 | -1.690393 | 6.551271  |

|   |           |           |           |
|---|-----------|-----------|-----------|
| H | -6.617919 | -0.889720 | 7.080905  |
| H | -9.023660 | 0.562661  | 6.238404  |
| H | -6.539309 | -1.199822 | 3.187809  |
| H | -9.308416 | -2.004175 | 2.398039  |
| H | -7.679021 | -3.221033 | 4.192875  |
| H | -8.760274 | -4.162755 | 1.832419  |
| H | -5.335166 | -3.423973 | 3.253748  |
| H | -3.261215 | -3.995972 | 2.043485  |
| H | -7.639160 | -4.886988 | -0.065289 |
| H | -4.401357 | -2.680800 | -0.907801 |
| H | -1.037285 | -0.711969 | -2.680616 |
| H | -4.103971 | -0.424578 | -3.135738 |
| H | -4.780826 | -0.377698 | -0.245399 |
| H | -8.041581 | -0.665856 | -1.492446 |
| H | -6.603273 | -0.300402 | 1.071902  |
| H | -8.290472 | 1.650167  | -1.898610 |
| H | -8.935418 | 1.309689  | -0.277274 |
| H | -3.516639 | -7.507643 | -2.390538 |
| H | -0.913291 | -6.576860 | -4.665305 |
| H | -0.986499 | -8.997440 | -2.803861 |
| H | 0.313777  | -8.756479 | -5.278558 |
| H | 2.528761  | -8.717867 | -2.435642 |
| H | 1.384936  | -7.361689 | -3.803858 |
| H | 0.289873  | -7.406404 | -0.951318 |
| H | 2.176476  | -4.266016 | 0.004484  |
| H | 4.426208  | -5.281676 | 1.787633  |
| H | 5.304970  | -3.155549 | 0.565173  |
| H | -2.840450 | 1.123032  | -4.039972 |
| H | 2.229989  | 1.341539  | -1.026686 |
| H | 2.518072  | 0.206918  | -5.149972 |
| H | 1.500155  | -1.999185 | -4.593343 |
| H | 3.282902  | 2.833932  | -2.616421 |
| H | 2.976149  | 2.943541  | -5.329417 |
| H | 0.942574  | 2.537977  | -5.587341 |
| H | 0.930203  | 3.086985  | -2.676232 |
| H | 1.836355  | 5.078962  | -2.039958 |
| H | 1.271822  | 7.117805  | -4.077055 |
| H | -1.034427 | 9.087706  | 1.004399  |
| H | 2.574544  | 8.755548  | -1.317155 |
| H | 2.348973  | 10.018548 | 0.526899  |
| H | -2.705505 | 6.842168  | -1.112111 |
| H | -1.421543 | 8.554431  | -3.412675 |
| H | -3.312699 | 6.316739  | -5.335732 |
| H | -3.143441 | 3.860126  | -5.031733 |
| H | -0.568997 | 4.494987  | -1.660251 |
| H | -0.872496 | 2.354125  | -2.364033 |

Table S7. Cartesian coordinates for Des-Vanco-PG complex

|   | <i>x</i>  | <i>y</i>  | <i>z</i>  |
|---|-----------|-----------|-----------|
| C | 3.122686  | 7.575430  | 4.131396  |
| C | 3.536587  | 6.333278  | 3.359702  |
| O | 4.703884  | 6.057263  | 3.136123  |
| N | 2.495984  | 5.553686  | 2.928104  |
| C | 2.696790  | 4.431556  | 2.003361  |
| C | 3.370216  | 3.231432  | 2.707786  |
| C | 3.697123  | 2.086669  | 1.745558  |
| C | 4.216511  | 0.827404  | 2.446961  |
| C | 4.596490  | -0.248478 | 1.424245  |
| N | 4.956094  | -1.535252 | 2.016365  |
| C | 1.342555  | 4.024541  | 1.397905  |
| O | 1.188465  | 3.913275  | 0.177493  |
| N | 0.379120  | 3.795042  | 2.310227  |
| C | -0.948377 | 3.254821  | 2.036691  |
| C | -2.030136 | 4.345723  | 2.086325  |
| C | -1.213524 | 2.198238  | 3.131834  |
| O | -0.530940 | 2.197629  | 4.159909  |
| N | -2.234771 | 1.364033  | 2.896703  |
| C | -2.725287 | 0.427610  | 3.902218  |
| C | -1.929148 | -0.886255 | 3.904453  |
| C | -4.237166 | 0.163457  | 3.712062  |
| O | -4.781847 | -0.493733 | 4.631619  |
| O | -4.800779 | 0.615983  | 2.679892  |
| N | 6.303749  | -0.345874 | -3.180467 |
| C | 5.611829  | -1.157495 | -2.181728 |
| C | 6.516205  | -2.225217 | -1.559516 |
| O | 6.059318  | -3.155115 | -0.883562 |
| N | 7.827294  | -2.052020 | -1.811932 |
| C | 8.852833  | -3.034993 | -1.520632 |
| C | 10.071882 | -2.532993 | -0.736946 |
| O | 11.167838 | -3.019569 | -0.951853 |
| N | 9.842312  | -1.570413 | 0.201022  |
| C | 10.926428 | -1.072989 | 1.041408  |
| C | 11.068591 | -1.835942 | 2.373224  |
| O | 12.100043 | -2.394338 | 2.700735  |
| N | 9.934605  | -1.838818 | 3.128720  |
| C | 9.762108  | -2.681399 | 4.300489  |
| C | 8.319013  | -3.196931 | 4.361986  |
| O | 7.691360  | -3.231735 | 5.400350  |

|   |           |           |           |
|---|-----------|-----------|-----------|
| N | 7.791418  | -3.573804 | 3.140893  |
| C | 6.393063  | -3.299405 | 2.876661  |
| C | 6.218997  | -1.873745 | 2.312878  |
| O | 7.186863  | -1.118561 | 2.157982  |
| H | -2.603299 | 0.900252  | 4.879261  |
| H | -0.877979 | -0.682860 | 4.118859  |
| H | -2.328270 | -1.552547 | 4.670809  |
| H | -1.999667 | -1.380110 | 2.931020  |
| H | -2.764724 | 1.433660  | 2.031060  |
| H | -0.948856 | 2.785554  | 1.054537  |
| H | -1.795754 | 5.151159  | 1.389470  |
| H | -2.997642 | 3.919503  | 1.819207  |
| H | -2.100535 | 4.769668  | 3.091590  |
| H | 0.638842  | 3.688392  | 3.287870  |
| H | 3.327257  | 4.757862  | 1.172677  |
| H | 1.564901  | 5.937153  | 2.992281  |
| H | 2.212311  | 7.417551  | 4.714644  |
| H | 2.941435  | 8.393046  | 3.427327  |
| H | 3.938919  | 7.856930  | 4.795497  |
| H | 4.285130  | 3.601713  | 3.173761  |
| H | 2.715011  | 2.871453  | 3.508488  |
| H | 2.802246  | 1.817949  | 1.173617  |
| H | 4.436941  | 2.434841  | 1.013934  |
| H | 5.091019  | 1.062617  | 3.062252  |
| H | 3.446206  | 0.434300  | 3.118926  |
| H | 3.757307  | -0.432457 | 0.748894  |
| H | 5.446564  | 0.100968  | 0.833677  |
| H | 4.269987  | -2.282057 | 1.965584  |
| H | 5.973404  | -4.015349 | 2.167624  |
| H | 5.846866  | -3.393781 | 3.816266  |
| H | 8.393752  | -3.357655 | 2.358393  |
| H | 10.483247 | -3.501722 | 4.240095  |
| H | 9.940870  | -2.146980 | 5.236353  |
| H | 9.108785  | -1.341008 | 2.804703  |
| H | 11.862207 | -1.205664 | 0.503328  |
| H | 10.764289 | -0.009420 | 1.237527  |
| H | 8.899292  | -1.237899 | 0.354345  |
| H | 8.385305  | -3.845435 | -0.956171 |
| H | 9.253606  | -3.462065 | -2.442570 |
| H | 8.013785  | -1.264235 | -2.430475 |
| H | 5.272519  | -0.513423 | -1.367824 |
| H | 4.720274  | -1.679075 | -2.549465 |
| H | 6.195289  | -0.743102 | -4.107343 |
| H | 5.932595  | 0.603354  | -3.217298 |
| N | -7.565048 | -0.423629 | 4.670617  |
| C | -8.477206 | -1.095844 | 3.765291  |

|    |           |           |           |
|----|-----------|-----------|-----------|
| C  | -8.533966 | -0.574439 | 2.320167  |
| O  | -9.450330 | -0.970629 | 1.605868  |
| C  | -8.347692 | -2.658670 | 3.816510  |
| O  | -8.242339 | -3.077498 | 5.167504  |
| C  | -7.231197 | -3.226258 | 2.952007  |
| C  | -5.897051 | -3.209477 | 3.367852  |
| C  | -7.540740 | -3.757114 | 1.698652  |
| C  | -4.889337 | -3.626163 | 2.508617  |
| C  | -6.529544 | -4.191656 | 0.848649  |
| Cl | -6.944557 | -4.838943 | -0.732199 |
| C  | -5.193877 | -4.087547 | 1.231631  |
| O  | -4.168009 | -4.380893 | 0.344654  |
| N  | -7.604359 | 0.334171  | 1.911955  |
| C  | -7.809159 | 1.040938  | 0.658570  |
| C  | -6.688946 | 0.995455  | -0.394036 |
| O  | -6.936259 | 1.454475  | -1.509818 |
| C  | -8.273023 | 2.512103  | 0.863634  |
| C  | -7.187396 | 3.453739  | 1.376250  |
| O  | -7.079114 | 3.757879  | 2.552798  |
| N  | -6.356311 | 3.945645  | 0.409352  |
| H  | -5.535339 | 4.447442  | 0.711051  |
| H  | -6.375368 | 3.572197  | -0.528330 |
| N  | -5.490333 | 0.453750  | -0.071369 |
| C  | -4.460731 | 0.350100  | -1.093504 |
| C  | -3.483085 | 1.544950  | -1.041984 |
| O  | -2.915583 | 1.871116  | -0.006015 |
| C  | -3.691868 | -0.974641 | -0.998411 |
| C  | -4.272458 | -2.059535 | -0.353577 |
| C  | -2.434282 | -1.123714 | -1.585209 |
| C  | -3.619952 | -3.291705 | -0.297601 |
| C  | -1.771039 | -2.344968 | -1.502562 |
| C  | -2.361818 | -3.454821 | -0.887882 |
| O  | -1.692076 | -4.660889 | -0.796076 |
| N  | -3.257992 | 2.162171  | -2.227894 |
| C  | -2.073487 | 2.983824  | -2.451831 |
| C  | -1.562293 | 2.625758  | -3.871026 |
| O  | -2.361072 | 2.232175  | -4.714007 |
| C  | -2.234418 | 4.503497  | -2.413017 |
| C  | -1.345895 | 5.253058  | -1.643682 |
| C  | -1.221126 | 6.641324  | -1.782354 |
| C  | -3.038197 | 6.563074  | -3.400539 |
| C  | -3.096629 | 5.182546  | -3.284281 |
| C  | -2.081123 | 7.292127  | -2.684175 |
| O  | -2.016917 | 8.634112  | -2.893661 |
| N  | -0.250030 | 2.813087  | -4.148811 |
| C  | 0.801159  | 3.290952  | -3.269889 |

|    |           |           |           |
|----|-----------|-----------|-----------|
| C  | 1.092084  | 4.775241  | -3.608202 |
| O  | 0.843782  | 5.209939  | -4.723572 |
| C  | 2.045182  | 2.361152  | -3.327408 |
| O  | 2.640577  | 2.505857  | -4.609353 |
| C  | 1.592803  | 0.944316  | -3.005771 |
| C  | 1.153828  | 0.065730  | -3.998069 |
| C  | 1.428443  | 0.584979  | -1.667167 |
| C  | 0.484906  | -1.105144 | -3.656088 |
| C  | 0.769448  | -0.590020 | -1.323852 |
| Cl | 0.550715  | -0.985707 | 0.365168  |
| C  | 0.246786  | -1.420584 | -2.321846 |
| O  | -0.497326 | -2.544044 | -2.022144 |
| N  | 1.524889  | 5.511690  | -2.569120 |
| C  | 1.705114  | 6.956369  | -2.667214 |
| C  | 3.184160  | 7.369724  | -3.075474 |
| C  | 1.146400  | 7.612884  | -1.397857 |
| C  | 1.987302  | 8.376942  | -0.588990 |
| C  | -0.205774 | 7.429325  | -1.003156 |
| C  | 1.522124  | 8.944818  | 0.594732  |
| O  | 2.346063  | 9.696815  | 1.395872  |
| C  | -0.640533 | 8.013037  | 0.205116  |
| O  | -1.925155 | 7.860539  | 0.646468  |
| C  | 0.210490  | 8.762982  | 1.012308  |
| O  | 3.404541  | 8.586827  | -3.103483 |
| O  | 3.943559  | 6.407219  | -3.361154 |
| C  | -1.705798 | -5.433670 | -1.966098 |
| C  | -0.880798 | -6.704238 | -1.752746 |
| O  | 0.513458  | -6.412952 | -1.648859 |
| C  | -1.048327 | -7.635135 | -2.966791 |
| O  | -0.378462 | -8.871626 | -2.758171 |
| C  | -2.507742 | -7.902966 | -3.314137 |
| O  | -2.647724 | -8.649243 | -4.519411 |
| C  | -3.254959 | -6.561866 | -3.411924 |
| O  | -3.051493 | -5.797706 | -2.225339 |
| C  | -4.764047 | -6.730842 | -3.556533 |
| O  | -5.343840 | -7.347066 | -2.422108 |
| H  | -1.310162 | -4.851464 | -2.812015 |
| H  | -5.209677 | -5.746357 | -3.748797 |
| H  | -4.960860 | -7.380617 | -4.410880 |
| C  | 1.210898  | -6.992498 | -0.545467 |
| C  | 2.693173  | -7.097853 | -0.913246 |
| C  | 3.467335  | -5.762563 | -0.856996 |
| N  | 4.913324  | -6.053707 | -1.004006 |
| C  | 3.104134  | -4.867178 | -2.054916 |
| C  | 3.110653  | -5.086508 | 0.497628  |
| C  | 1.589981  | -4.977450 | 0.711647  |

|   |           |           |           |
|---|-----------|-----------|-----------|
| O | 1.010639  | -6.299026 | 0.652724  |
| C | 1.217980  | -4.419987 | 2.073824  |
| H | 0.797957  | -7.988269 | -0.356511 |
| H | 2.805312  | -7.534401 | -1.909139 |
| H | 3.135297  | -7.798333 | -0.199543 |
| H | 3.653635  | -3.924922 | -2.010878 |
| H | 2.039868  | -4.649816 | -2.093822 |
| H | 3.385658  | -5.381398 | -2.977191 |
| H | 0.131804  | -4.399206 | 2.175091  |
| H | 1.598616  | -3.404724 | 2.185558  |
| H | 1.629350  | -5.046741 | 2.870614  |
| O | 3.687354  | -3.787150 | 0.645447  |
| H | 5.442118  | -5.232161 | -0.790844 |
| H | 5.170977  | -6.788183 | -0.376185 |
| H | -6.742128 | -0.150286 | 4.172534  |
| H | -8.009736 | 0.387585  | 5.050333  |
| H | -9.471422 | -0.877318 | 4.162256  |
| H | -7.760360 | -2.381556 | 5.634206  |
| H | -9.292639 | -3.049897 | 3.435766  |
| H | -5.627949 | -2.809282 | 4.335484  |
| H | -3.847575 | -3.554915 | 2.796819  |
| H | -8.568572 | -3.792870 | 1.360573  |
| H | -5.239004 | -1.945346 | 0.111134  |
| H | -1.954643 | -0.294738 | -2.085365 |
| H | -4.993244 | 0.383319  | -2.047476 |
| H | -5.219577 | 0.344726  | 0.912535  |
| H | -8.639826 | 0.521061  | 0.176678  |
| H | -6.800212 | 0.563783  | 2.498782  |
| H | -8.650213 | 2.869708  | -0.096504 |
| H | -9.083899 | 2.516281  | 1.590985  |
| H | -5.206133 | -6.750156 | -1.675584 |
| H | -2.874568 | -6.008512 | -4.289415 |
| H | -2.976090 | -8.505855 | -2.533705 |
| H | -2.039814 | -8.280470 | -5.169136 |
| H | 0.561454  | -8.670665 | -2.705204 |
| H | -0.592075 | -7.110971 | -3.826049 |
| H | -1.245782 | -7.188119 | -0.841948 |
| H | 1.145941  | -4.356264 | -0.070508 |
| H | 3.489128  | -5.734665 | 1.301341  |
| H | 4.438537  | -3.662302 | 0.040000  |
| H | -3.692553 | 1.817949  | -3.076681 |
| H | 1.757060  | 1.254491  | -0.880951 |
| H | 1.279903  | 0.332347  | -5.039534 |
| H | 0.084488  | -1.764370 | -4.416926 |
| H | 2.741889  | 2.698987  | -2.556260 |
| H | 2.050055  | 3.000225  | -5.182488 |

|   |           |          |           |
|---|-----------|----------|-----------|
| H | -0.034100 | 2.856474 | -5.136990 |
| H | 0.458066  | 3.234838 | -2.240314 |
| H | 1.694736  | 5.064161 | -1.676264 |
| H | 1.096163  | 7.269571 | -3.521046 |
| H | -0.156525 | 9.206105 | 1.928824  |
| H | 2.993684  | 8.578312 | -0.935905 |
| H | 3.208239  | 9.751174 | 0.968024  |
| H | -2.396451 | 7.302073 | 0.012590  |
| H | -1.263219 | 8.977682 | -2.391806 |
| H | -3.689079 | 7.096651 | -4.082607 |
| H | -3.789895 | 4.624061 | -3.903321 |
| H | -0.681476 | 4.751443 | -0.950491 |
| H | -1.356181 | 2.706297 | -1.680468 |
